# Supplementary material for: Decoding the Role of H19 in Cholestatic Liver Injury Using snRNA-seq, Spatial Transcriptomics, and Machine Learning-Based Disease Prediction
Source: Research Square preprint supplement (doi:10.21203/rs.3.rs-8339668/v1), 2026-01-14

**Supplemental Methods:**

**Sequence mapping and filtering**

Original sequencing procedures were performed by SingulOmics. Nuclei from the four frozen mouse liver tissue samples were isolated. 3’ single cell gene expression libraries (Next GEM v3.1) were constructed using the 10x Genomics Chromium system. The libraries were then sequenced with ~200 million PE150 reads per sample on Illumina NovaSeq. After sequencing, clean reads were mapped into count data with mouse reference genome mm10 using Cell Ranger (v6.0.1). Filters of UMI>1200 and mitochondria < 10% were applied. Introns were included in the analysis. Samples were aggregated, and the gene-barcode matrices provided by SingulOmics were used for downstream analysis. The R package SoupX (version 1.6.2) was used to remove ambient RNA contamination(21). Endothelial-specific genes ***Ptprb, Pecam1, Stab2,*** *and* ***Eng*** were used as reference markers to assess ambient RNA contamination, based on their high expression specificity and tight clustering within endothelial cell populations in our mouse dataset(21). In the publicly available dataset GSE243981, raw reads were quality-controlled, mapped, and unique molecular identifiers (UMIs) quantified using Cell Ranger (v3). Viable cells were identified using EmptyDrops (v1.2.0), and ambient RNA contamination was corrected using SoupX (v1.2.2), as specified in the series matrix metadata(21, 22). For our analysis, we included scRNA-seq and snRNA-seq data from all primary biliary cholangitis (PBC) patients, six randomly selected primary sclerosing cholangitis (PSC) patients (GSM7883933, GSM7883934, GSM7883935, GSM7883936, GSM7883937, GSM7883938), and six randomly selected control patients (GSM7802679, GSM7802683, GSM7802688, GSM7802692, GSM7802693, GSM7802704). These data were used to evaluate the translational applicability of our mouse-derived gene prediction models in human liver disease samples.

**Neural Network Model**

A multilayer perceptron (MLP) classifier was implemented using the Keras API (R package keras v2.15.0) with a TensorFlow backend (R package tensorflow v2.16.0), interfaced via the reticulatepackage (v1.42.0) in R (v4.4.1)(34, 35). The network architecture consisted of two fully connected hidden layers with 16 and 8 units, respectively, each incorporating L2 regularization (λ = 0.01), batch normalization, and rectified linear unit (ReLU) activation functions. Dropout regularization (rate = 0.5) was applied following the first hidden layer to reduce overfitting. The output layer comprised a single neuron with a sigmoid activation function for binary classification. The model was trained using the Adam optimizer (learning rate = 0.0005) and binary cross-entropy loss function. Predictive performance was assessed using classification accuracy and the area under the receiver operating characteristic curve (ROC-AUC).

**XGBoost Model**

An XGBoost classifier was trained using a structured feature matrix with binary labels (0 = Healthy, 1 = Diseased). A grid search was conducted over hyperparameters including learning rate (η = 0.01, 0.05), tree depth (2, 3, 6), minimum child weight (2, 5, 10), and gamma (1, 2). Fixed parameters included a logistic objective, AUC evaluation metric, subsample ratio of 0.6, and L1/L2 regularization (α = 1, λ = 2). Five-fold cross-validation with early stopping (3 rounds) was used to select the best model based on mean AUC and stability (standard deviation < 0.02).

**Random Forest Model**

A random forest classifier was trained using the caret package in R(36, 37). A repeated 5-fold cross-validation (5 repeats) was used for model tuning. A grid search was performed over the number of variables randomly sampled at each split (mtry = 1 to 6). The model was trained with 500 trees, and accuracy was used as the tuning metric. The final model was selected based on cross-validated performance.

**Logistic Regression Model**

A logistic regression model was fitted using the training subset. The binary outcome variable was encoded as 1 (Diseased) and 0 (Healthy). The model was trained using the glm function in R with a binomial family and logit link. Probabilities were predicted on the test set, and model performance was evaluated using ROC-AUC.

**GeoMx® Digital Spatial Profiler**

Spatial transcriptomics was performed on liver sections from eight age-matched, 6-month-old female mice (four per genotype) across four slides using NanoString’s Whole Transcriptome Atlas (WTA) probe set and the GeoMx® Digital Spatial Profiler (DSP). Region-of-interest (ROI) selection was guided by three fluorescent morphology markers—AF488-conjugated anti–α-smooth muscle actin (αSMA), AF594-conjugated anti-CD68, and AF647-conjugated anti-EpCAM—along with the nuclear dye Syto 83, enabling identification of hepatocyte-, macrophage-, and bile duct–containing regions. Tissue preparation and processing were performed following the manufacturer’s protocol, GeoMx DSP Manual Slide Preparation: RNA FFPE (MAN-10150-02).

**Supplemental Tables:**

**Supp Table 1. Hepatocyte H19 expression associated genes that are also significantly associated with Mdr2KO and H19 deletion amelioration**

|  | **Mdr2KO vs DKO** | | | | | **Mdr2KO vs WT** | | | | |
| --- | --- | --- | --- | --- | --- | --- | --- | --- | --- | --- |
| **Gene** | **p_val** | **Log2FC** | **Pct.1** | **Pct.2** | **FDR** | **p_val** | **Log2FC** | **Pct.1** | **Pct.2** | **FDR** |
| Spp1 | 8.19E-138 | 1.595 | 0.452 | 0.215 | 6.14E-135 | 1E-323 | 5.564 | 0.452 | 0.039 | 7.26E-322 |
| Cd74 | 1.06E-102 | 1.325 | 0.383 | 0.185 | 2.82E-100 | 1E-323 | 3.433 | 0.383 | 0.094 | 7.25E-322 |

**Supp Table 2. Concordance of cholangiocyte top 5 H19 expression associated genes and cholestatic liver injury associated gene expression amelioration**

| DKOvsMdr2KO |  | | | | |  | | | | | |  |  |  |  | Mdr2KOvsWT |  |  |
| --- | --- | --- | --- | --- | --- | --- | --- | --- | --- | --- | --- | --- | --- | --- | --- | --- | --- | --- |
| **Symbol** | **p_val_**sheet1 | **avg_**log2FC_sheet1 | **pct.1_**sheet1 | **pct.2_**sheet1 | **p_**val_adj_sheet1 | **gene_sheet1** |  | **p_val_**sheet2 | **avg_log2FC_**sheet2 | | **pct.**1_sheet2 | pct.2_sheet2 |
| Frmd4b | ######## | 3.660989 | 0.301 | 0.012 | ######## | Frmd4b |  | 8.73E-18 | -3.3749 | 0.012 | | 0.237 |
| Gnas | ######## | 7.968516 | 0.23 | 0 | ######## | Gnas |  | 5.02E-24 | -7.90405 | 0 | | 0.194 |
| Csmd1 | ######## | -3.59095 | 0.054 | 0.359 | ######## | Csmd1 |  | 9.02E-14 | 5.597524 | 0.359 | | 0.032 |
| Agmo | 1.54E-98 | 3.414477 | 0.285 | 0.024 | 3.55E-94 | Agmo |  | 1.77E-49 | -4.94332 | 0.024 | | 0.581 |

| DKOvsMdr2KO | |  |  |  |  |  |  | Mdr2KOvsWT | |  |  |
| --- | --- | --- | --- | --- | --- | --- | --- | --- | --- | --- | --- |
| Symbol | p_val_sheet1 | avg_log2FC_sheet1 | pct.1_sheet1 | pct.2_sheet1 | p_val_adj_sheet1 | gene_sheet1 |  | p_val_sheet2 | avg_log2FC_sheet2 | pct.1_sheet2 | pct.2_sheet2 |
| Frmd4b | ######## | 3.660989 | 0.301 | 0.012 | ######## | Frmd4b |  | 8.73E-18 | -3.3749 | 0.012 | 0.237 |
| Gnas | ######## | 7.968516 | 0.23 | 0 | ######## | Gnas |  | 5.02E-24 | -7.90405 | 0 | 0.194 |
| Csmd1 | ######## | -3.59095 | 0.054 | 0.359 | ######## | Csmd1 |  | 9.02E-14 | 5.597524 | 0.359 | 0.032 |
| Agmo | 1.54E-98 | 3.414477 | 0.285 | 0.024 | 3.55E-94 | Agmo |  | 1.77E-49 | -4.94332 | 0.024 | 0.581 |

| DKOvsMdr2KO | |  |  |  |  |  |  | Mdr2KOvsWT | |  |  |
| --- | --- | --- | --- | --- | --- | --- | --- | --- | --- | --- | --- |
| Symbol | p_val_sheet1 | avg_log2FC_sheet1 | pct.1_sheet1 | pct.2_sheet1 | p_val_adj_sheet1 | gene_sheet1 |  | p_val_sheet2 | avg_log2FC_sheet2 | pct.1_sheet2 | pct.2_sheet2 |
| Frmd4b | ######## | 3.660989 | 0.301 | 0.012 | ######## | Frmd4b |  | 8.73E-18 | -3.3749 | 0.012 | 0.237 |
| Gnas | ######## | 7.968516 | 0.23 | 0 | ######## | Gnas |  | 5.02E-24 | -7.90405 | 0 | 0.194 |
| Csmd1 | ######## | -3.59095 | 0.054 | 0.359 | ######## | Csmd1 |  | 9.02E-14 | 5.597524 | 0.359 | 0.032 |
| Agmo | 1.54E-98 | 3.414477 | 0.285 | 0.024 | 3.55E-94 | Agmo |  | 1.77E-49 | -4.94332 | 0.024 | 0.581 |

**Supp Table 3. Hepatocytes CD74 and Ikbkb DGE analysis by MAST**

|  | **Mdr2KO vs DKO** | | | | |  | | | | |  |  |  | Mdr2KO vs WT |  |  |  |
| --- | --- | --- | --- | --- | --- | --- | --- | --- | --- | --- | --- | --- | --- | --- | --- | --- | --- |
| **Gene** | **p_val** | **log2FC** | **pct.1** | **pct.2** | **FDR** |  | **p_**val | **log2FC** | **pct.1** | **pct.**2 | FDR |
| Cd74 | ######## | 1.325239 | 0.383 | 0.185 | ######## |  | 1E-323 | 3.433443 | 0.383 | 0.094 | 7.26E-322 |
| Ikbkb | 6.01E-08 | -0.32984 | 0.26 | 0.28 | 1.17E-07 |  | 1.55E-21 | -0.46281 | 0.26 | 0.335 | 3.08E-21 |

**Supplementary Figure Legends:**

**Supp Fig 1. Top marker genes for the cholangiocyte disease–associated cluster.**

Volcano plot showing differentially expressed genes for subclustered cholangiocytes, highlighting the top markers distinguishing cluster 2 from all other cholangiocyte clusters. Marker genes were identified using Seurat’s FindMarkers function, comparing cluster 2 against all remaining clusters. Statistical significance was assessed using MAST with Benjamini–Hochberg correction (adjusted p < 0.05; |log₂FC| > 0.5).

**Supp Fig 2. Summary of CellChat-inferred cell–cell communication.**

(A) Circle plots showing the number and strength of inferred cell–cell interactions across Wild Type, H19KO, Mdr2KO, and DKO mice. Curve colors correspond to the originating (outgoing) signaling cell type, and curve thickness reflects the relative number of interactions.
(B) Bar charts summarizing total inferred interaction counts and overall interaction strength for each genotype, illustrating the comparative increases or decreases in communication intensity across samples.

**Supp Fig 3. H19 deletion attenuates collagen signaling.**

CellChatv2 collagen signaling pathway analysis. A) Scatter plots and B) circle plots showing significant alterations in both signaling sources and target (receivers) cell populations when comparing diseased and healthy mice. Line colors denote the ligand-expressing (source) cell type, and line width represents the relative interaction strength within the collagen signaling network.

**Supp Fig 4. H19 deletion attenuates FN1 (fibronectin) signaling.**

CellChat v2 analysis of the fibronectin (FN1) signaling pathway.
(A) Scatter plots and (B) circle plots illustrating significant changes in both signaling source and receiver cell populations when comparing diseased and healthy mice. Line colors denote the ligand-producing (source) cell type, and line width reflects the relative interaction strength within the FN1 signaling network.

**Supp Fig 5. H19 deletion attenuates laminin signaling.**
CellChat v2 analysis of the laminin signaling pathway.
(A) Scatter plots and (B) circle plots demonstrating significant changes in both ligand-producing (source) and receiving cell populations when comparing diseased and healthy mice. Line colors indicate the signaling source, and line width represents the relative interaction strength within the laminin network.

**Supp Fig 6. Dot and violin plots illustrating disease- and cell-specific expression switching of Spp1 and Clu.**(A) Dot plot and (B) violin plots showing differential expression of the indicated features across disease states and relevant cell populations. Statistical significance was determined using the Wilcoxon test implemented in SeuratExtend (*p < 0.05, *****p*** < 0.01, ******p*** < 0.001, *******p*** < 0.0001)

**Supp Fig 7. Hepatocyte zonation markers**

Dot plot showing the expression patterns of key hepatocyte zonation marker genes across hepatocyte subclusters.

**Supp Fig. 8. Random forest–based hepatocyte gene model for disease prediction.**A) ROC-AUC plot showing AUC score for the six-gene prediction model shown in panel B. B) Bar plots showing random forest model variable importance, indicating Gm13775 as the most important in differentiating between healthy and diseased hepatocytes. C) Violin plots showing expression of genes in the prediction model split on (i) cell type and by (ii) disease state.

**Supp Fig. 9. APP signaling pathway alterations across genotypes**.

Predicted APP signaling–related cell–cell communication and ligand–receptor interactions stratified by genotype. Bar plots illustrate the relative contribution of individual ligand–receptor pairs to APP signaling. Circle plots depict the corresponding cell–cell communication patterns for each contributing ligand–receptor interaction within each genotype.

**Supp Fig. 10. Cell type specific random forest models for H19 expression prediction.**
The top 13 genes from LASSO Regression were used to generate several cell type specific random forest models closely related to H19 expression split by cell type: A) cholangiocytes, B) hepatocytes, C) Macrophages. Within each cell type are ROC-AUC plots with variable importance for gene models including (i) and not including (ii) *Xist* and *Tsix* in the model.

**Supplemental Figures:**


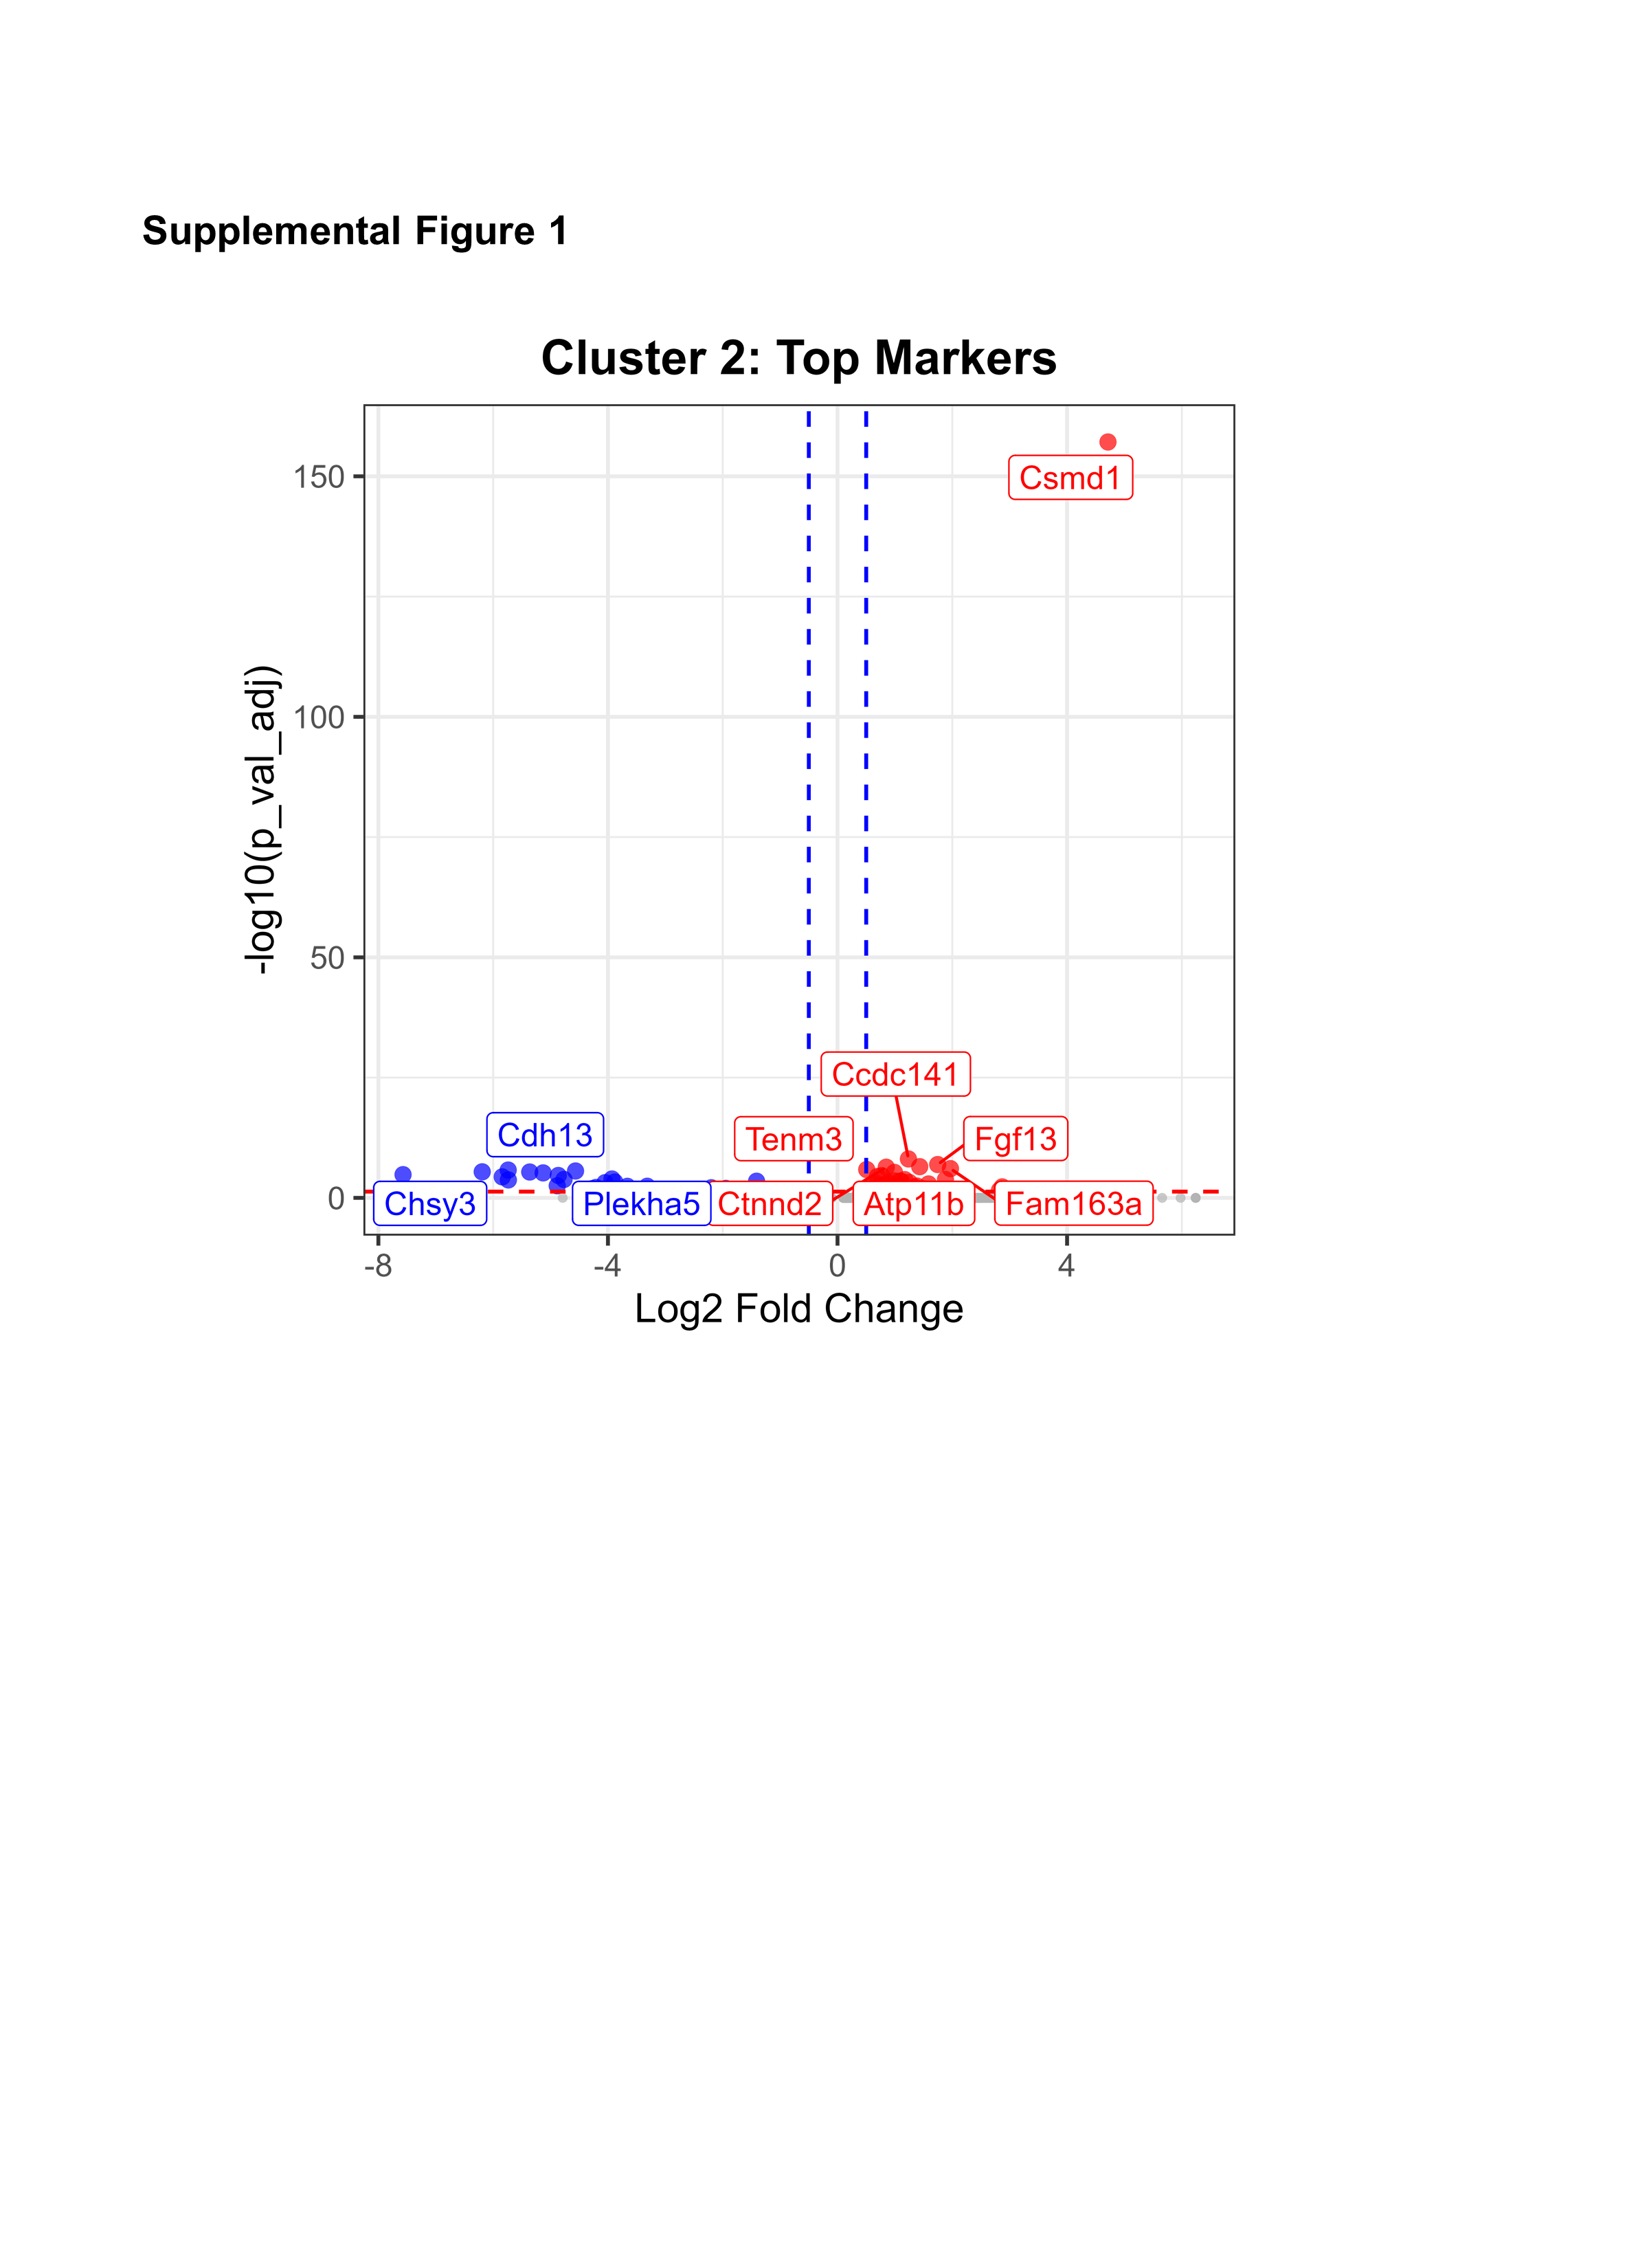


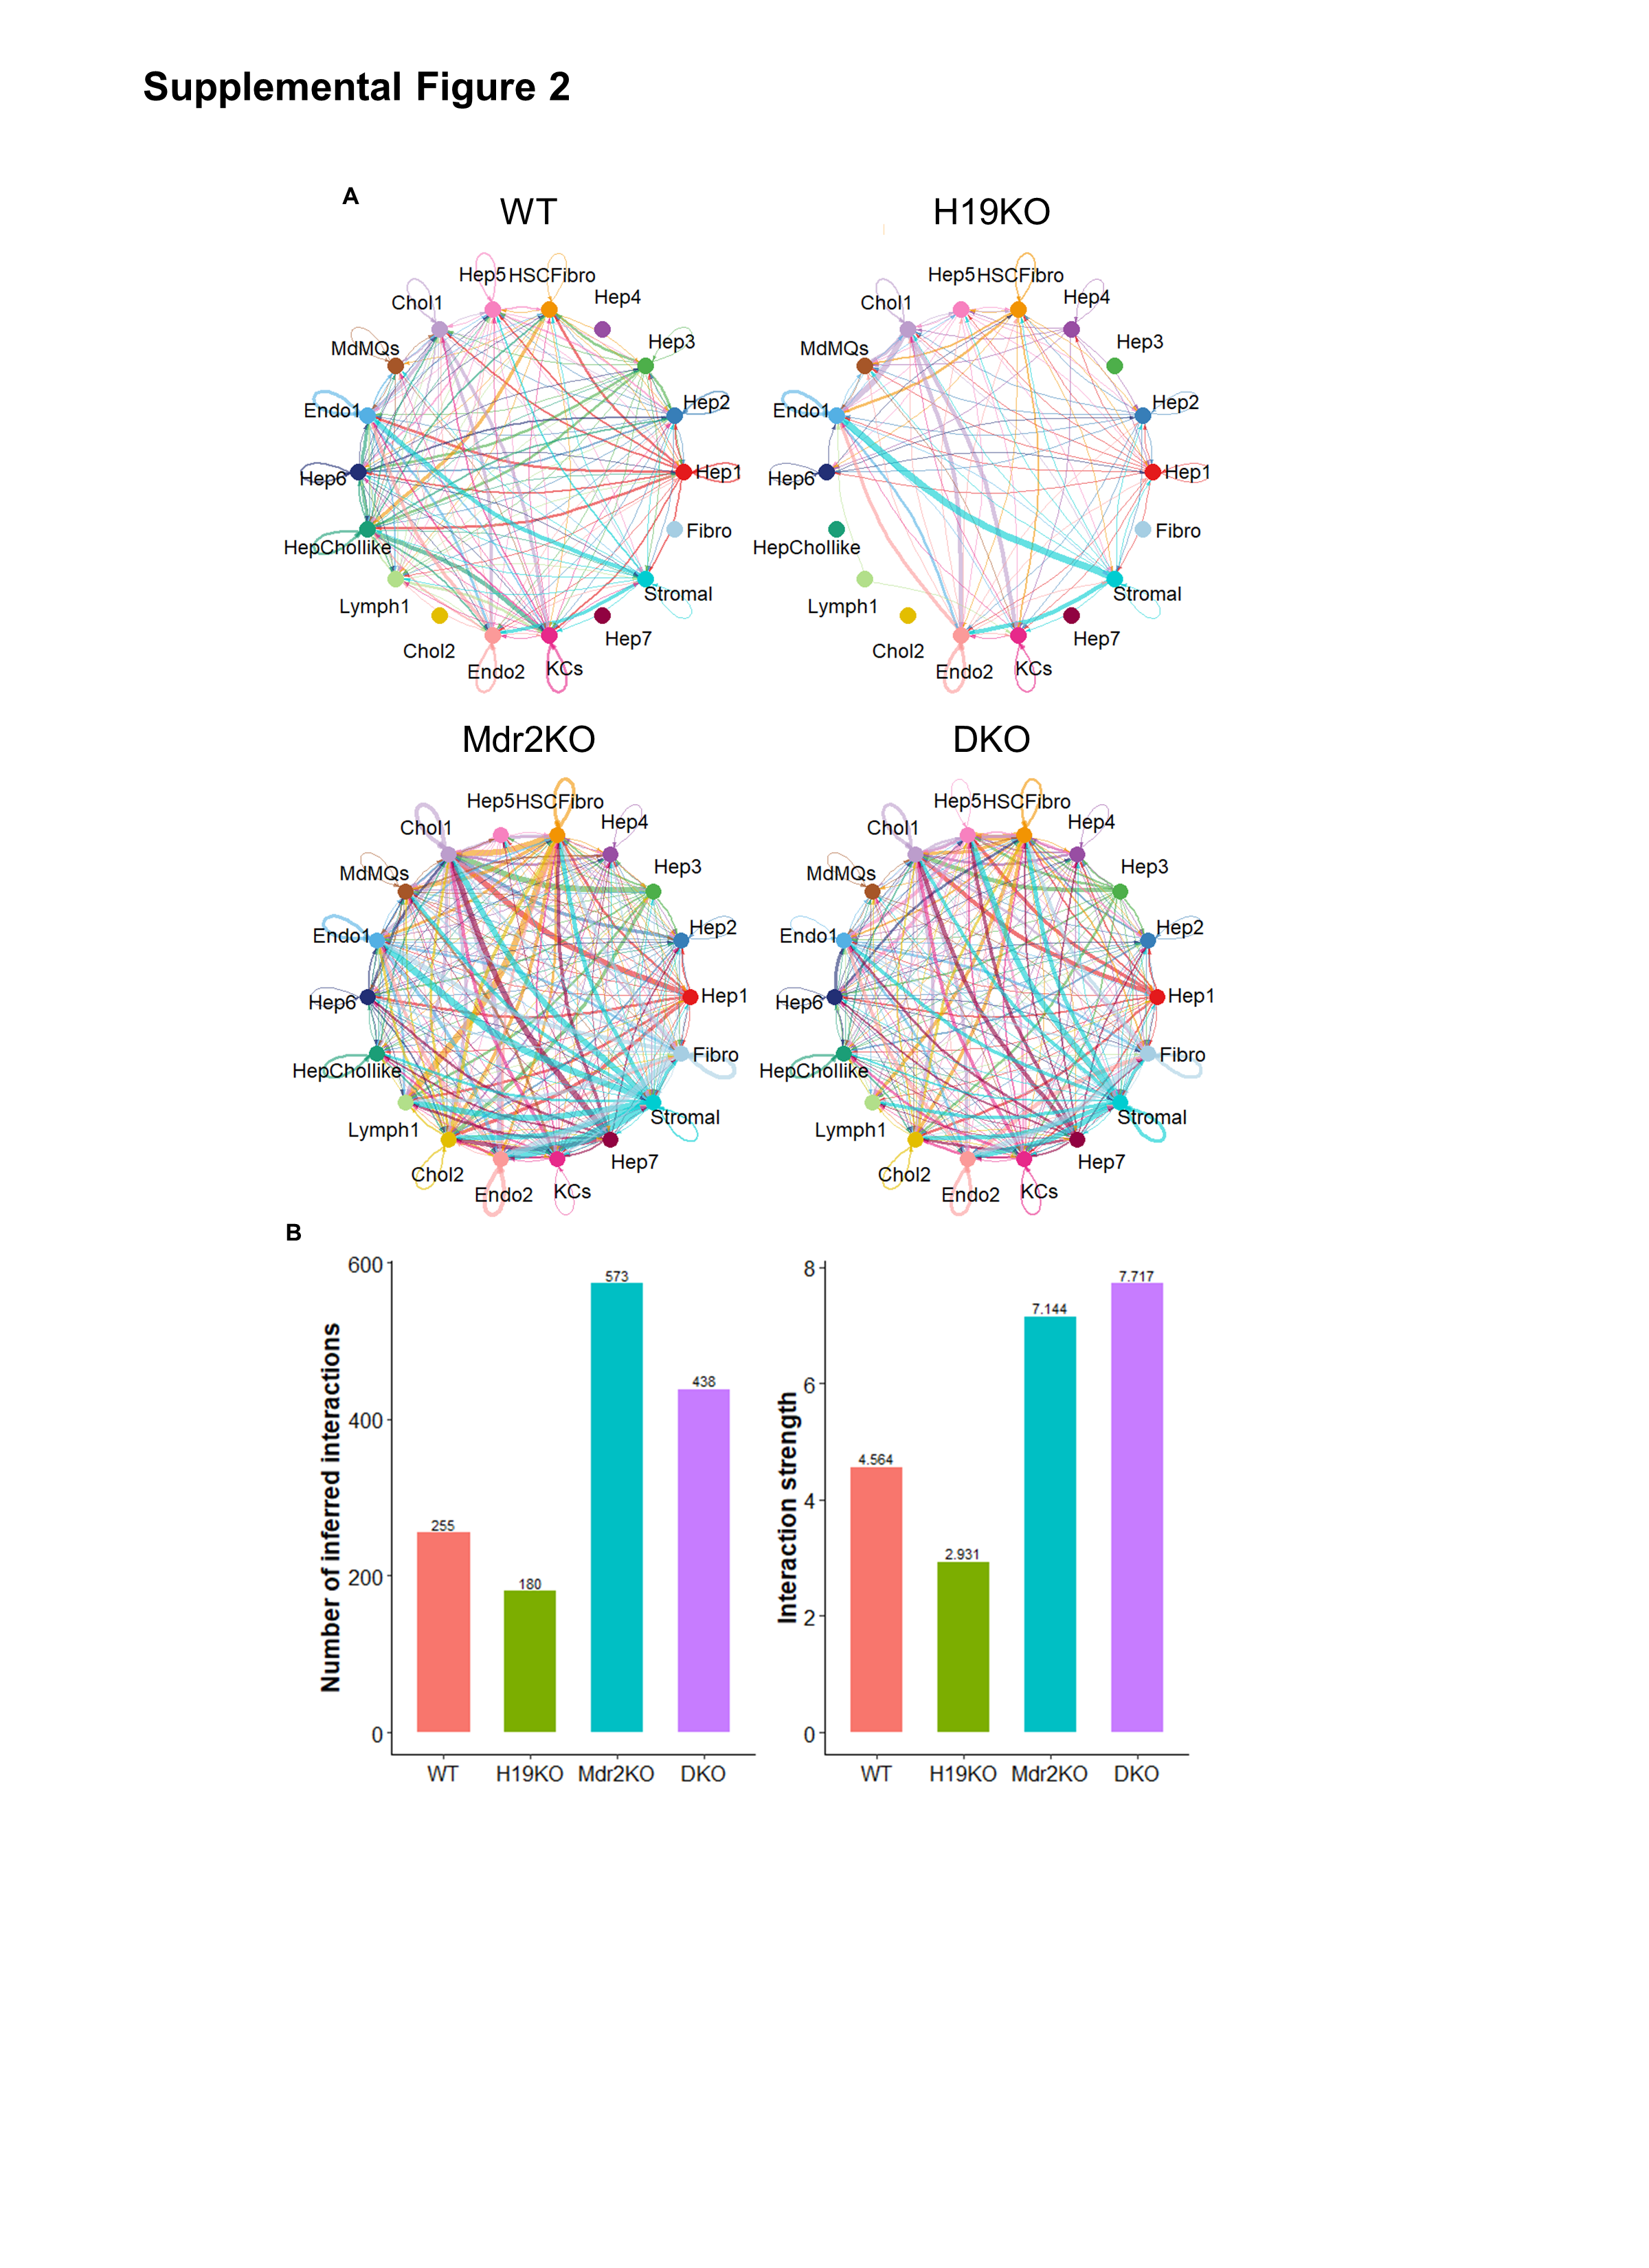


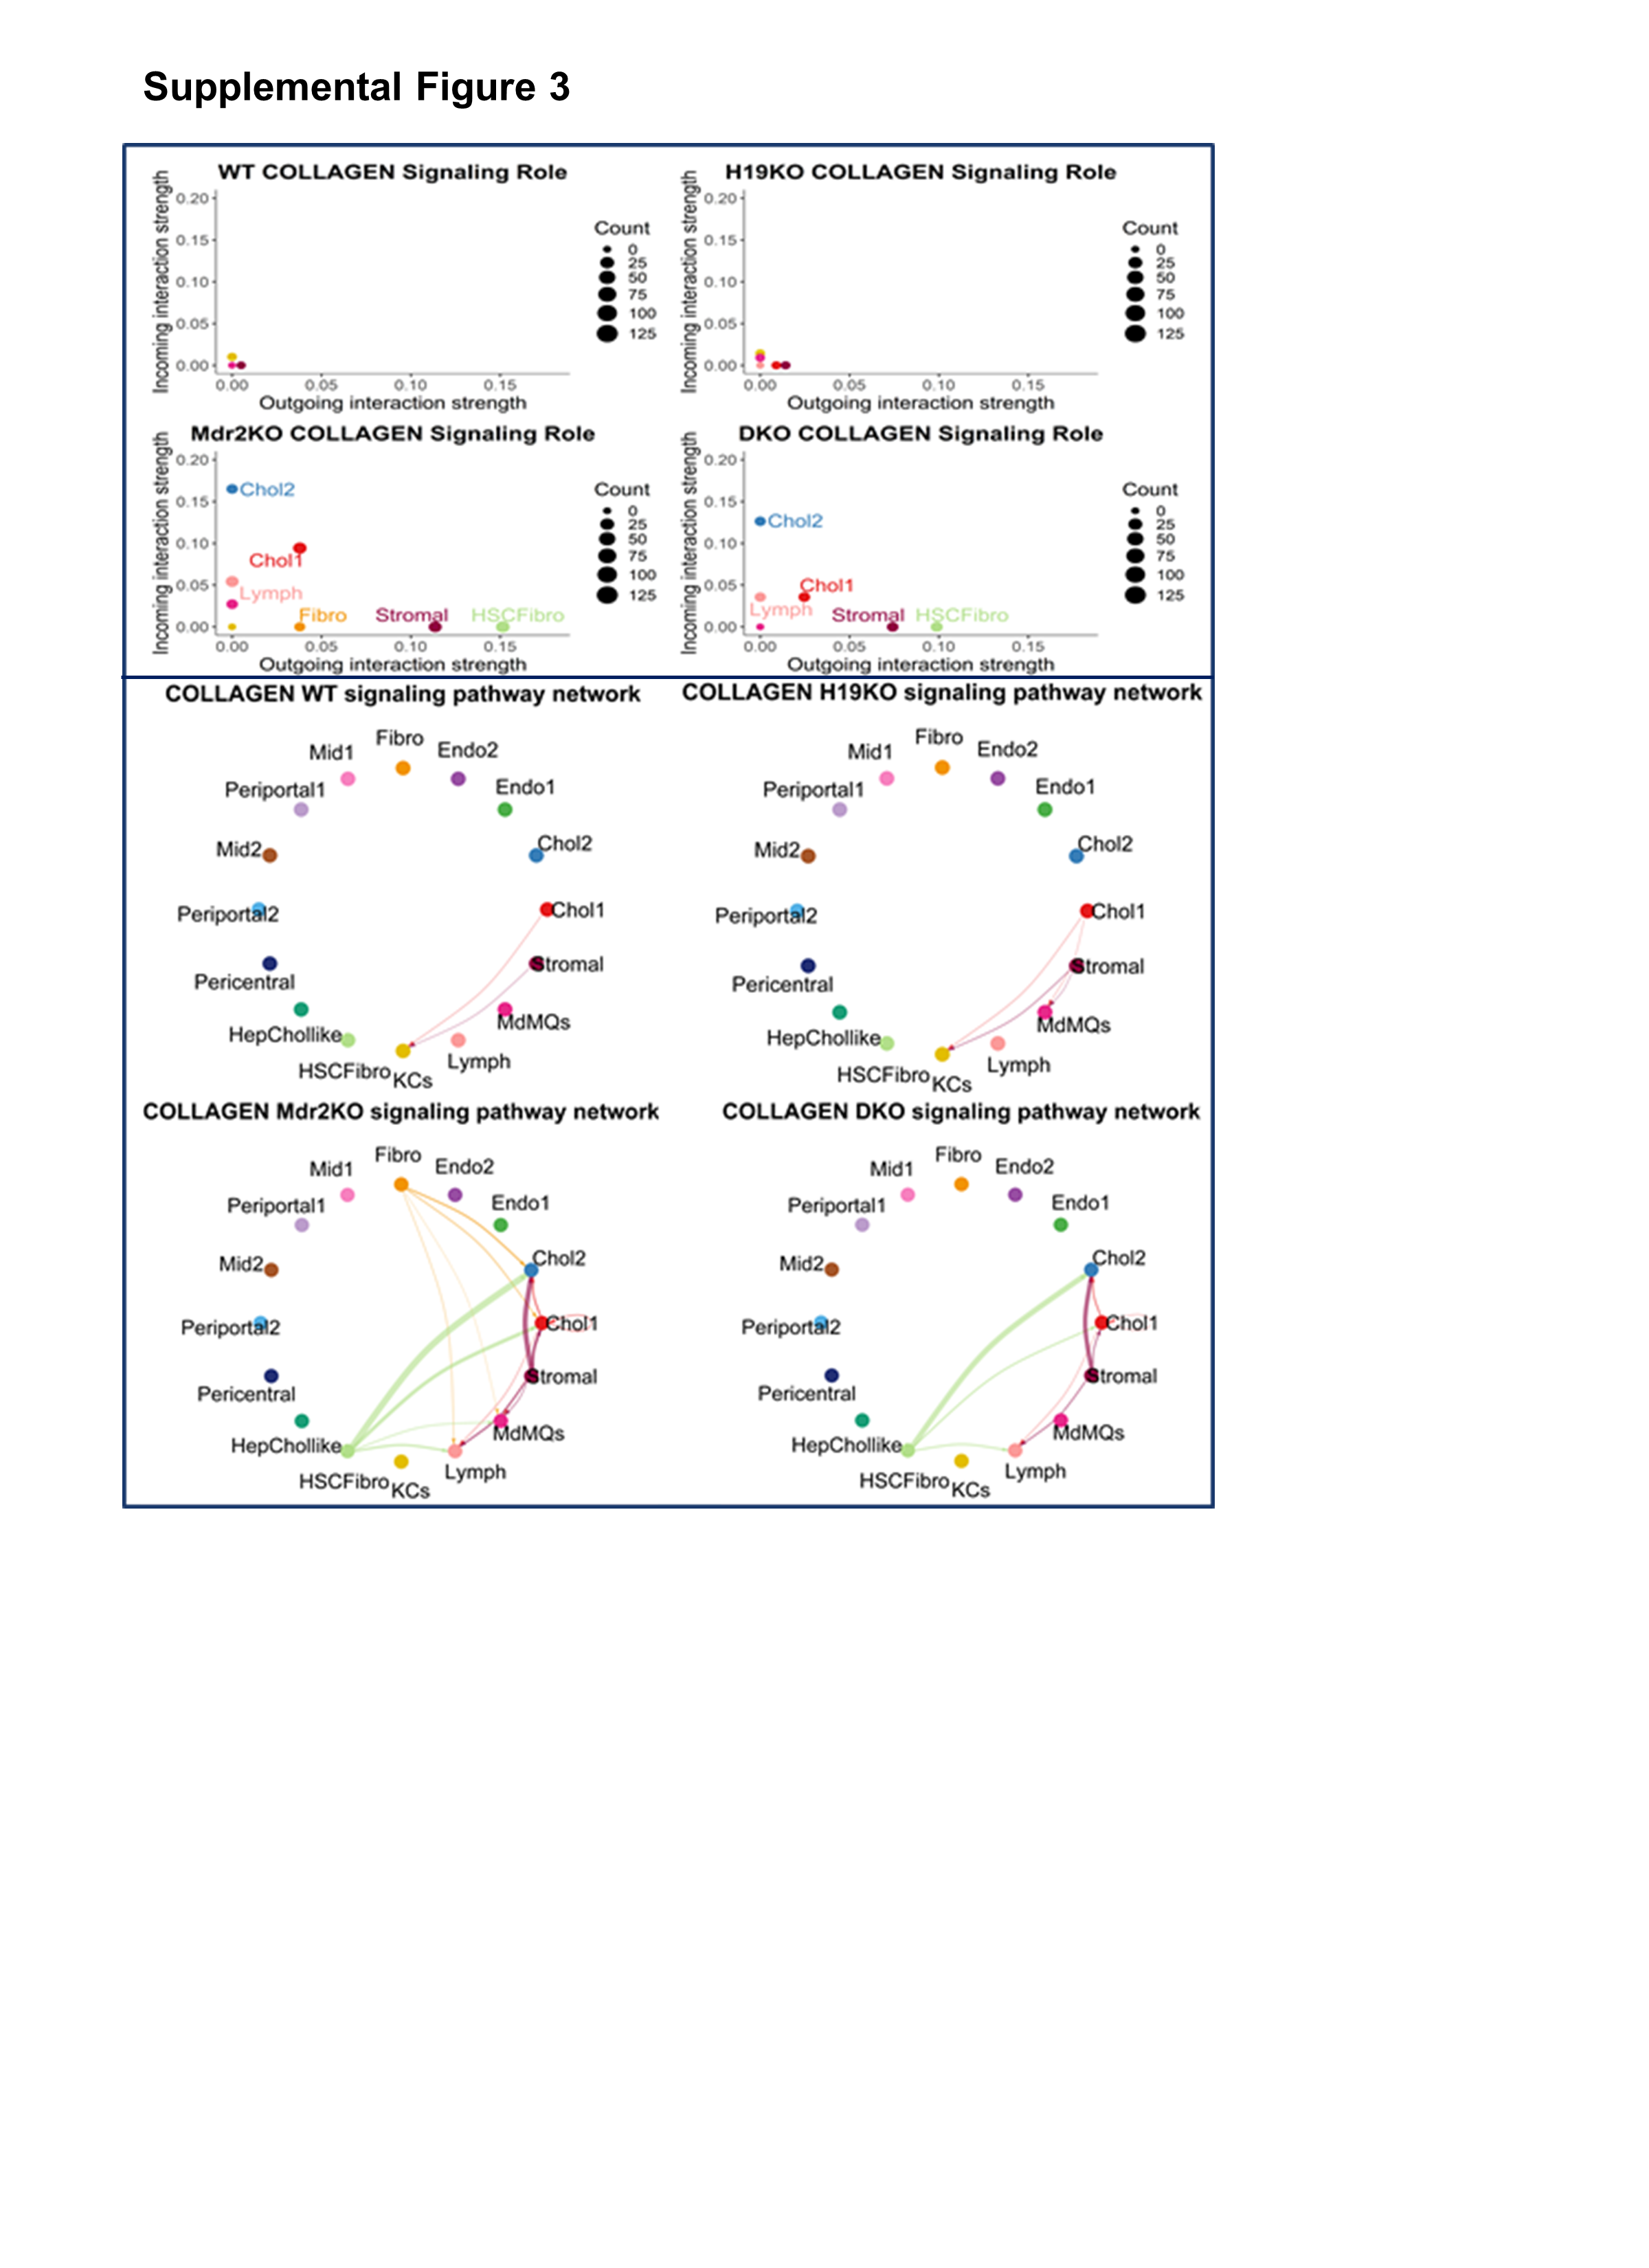


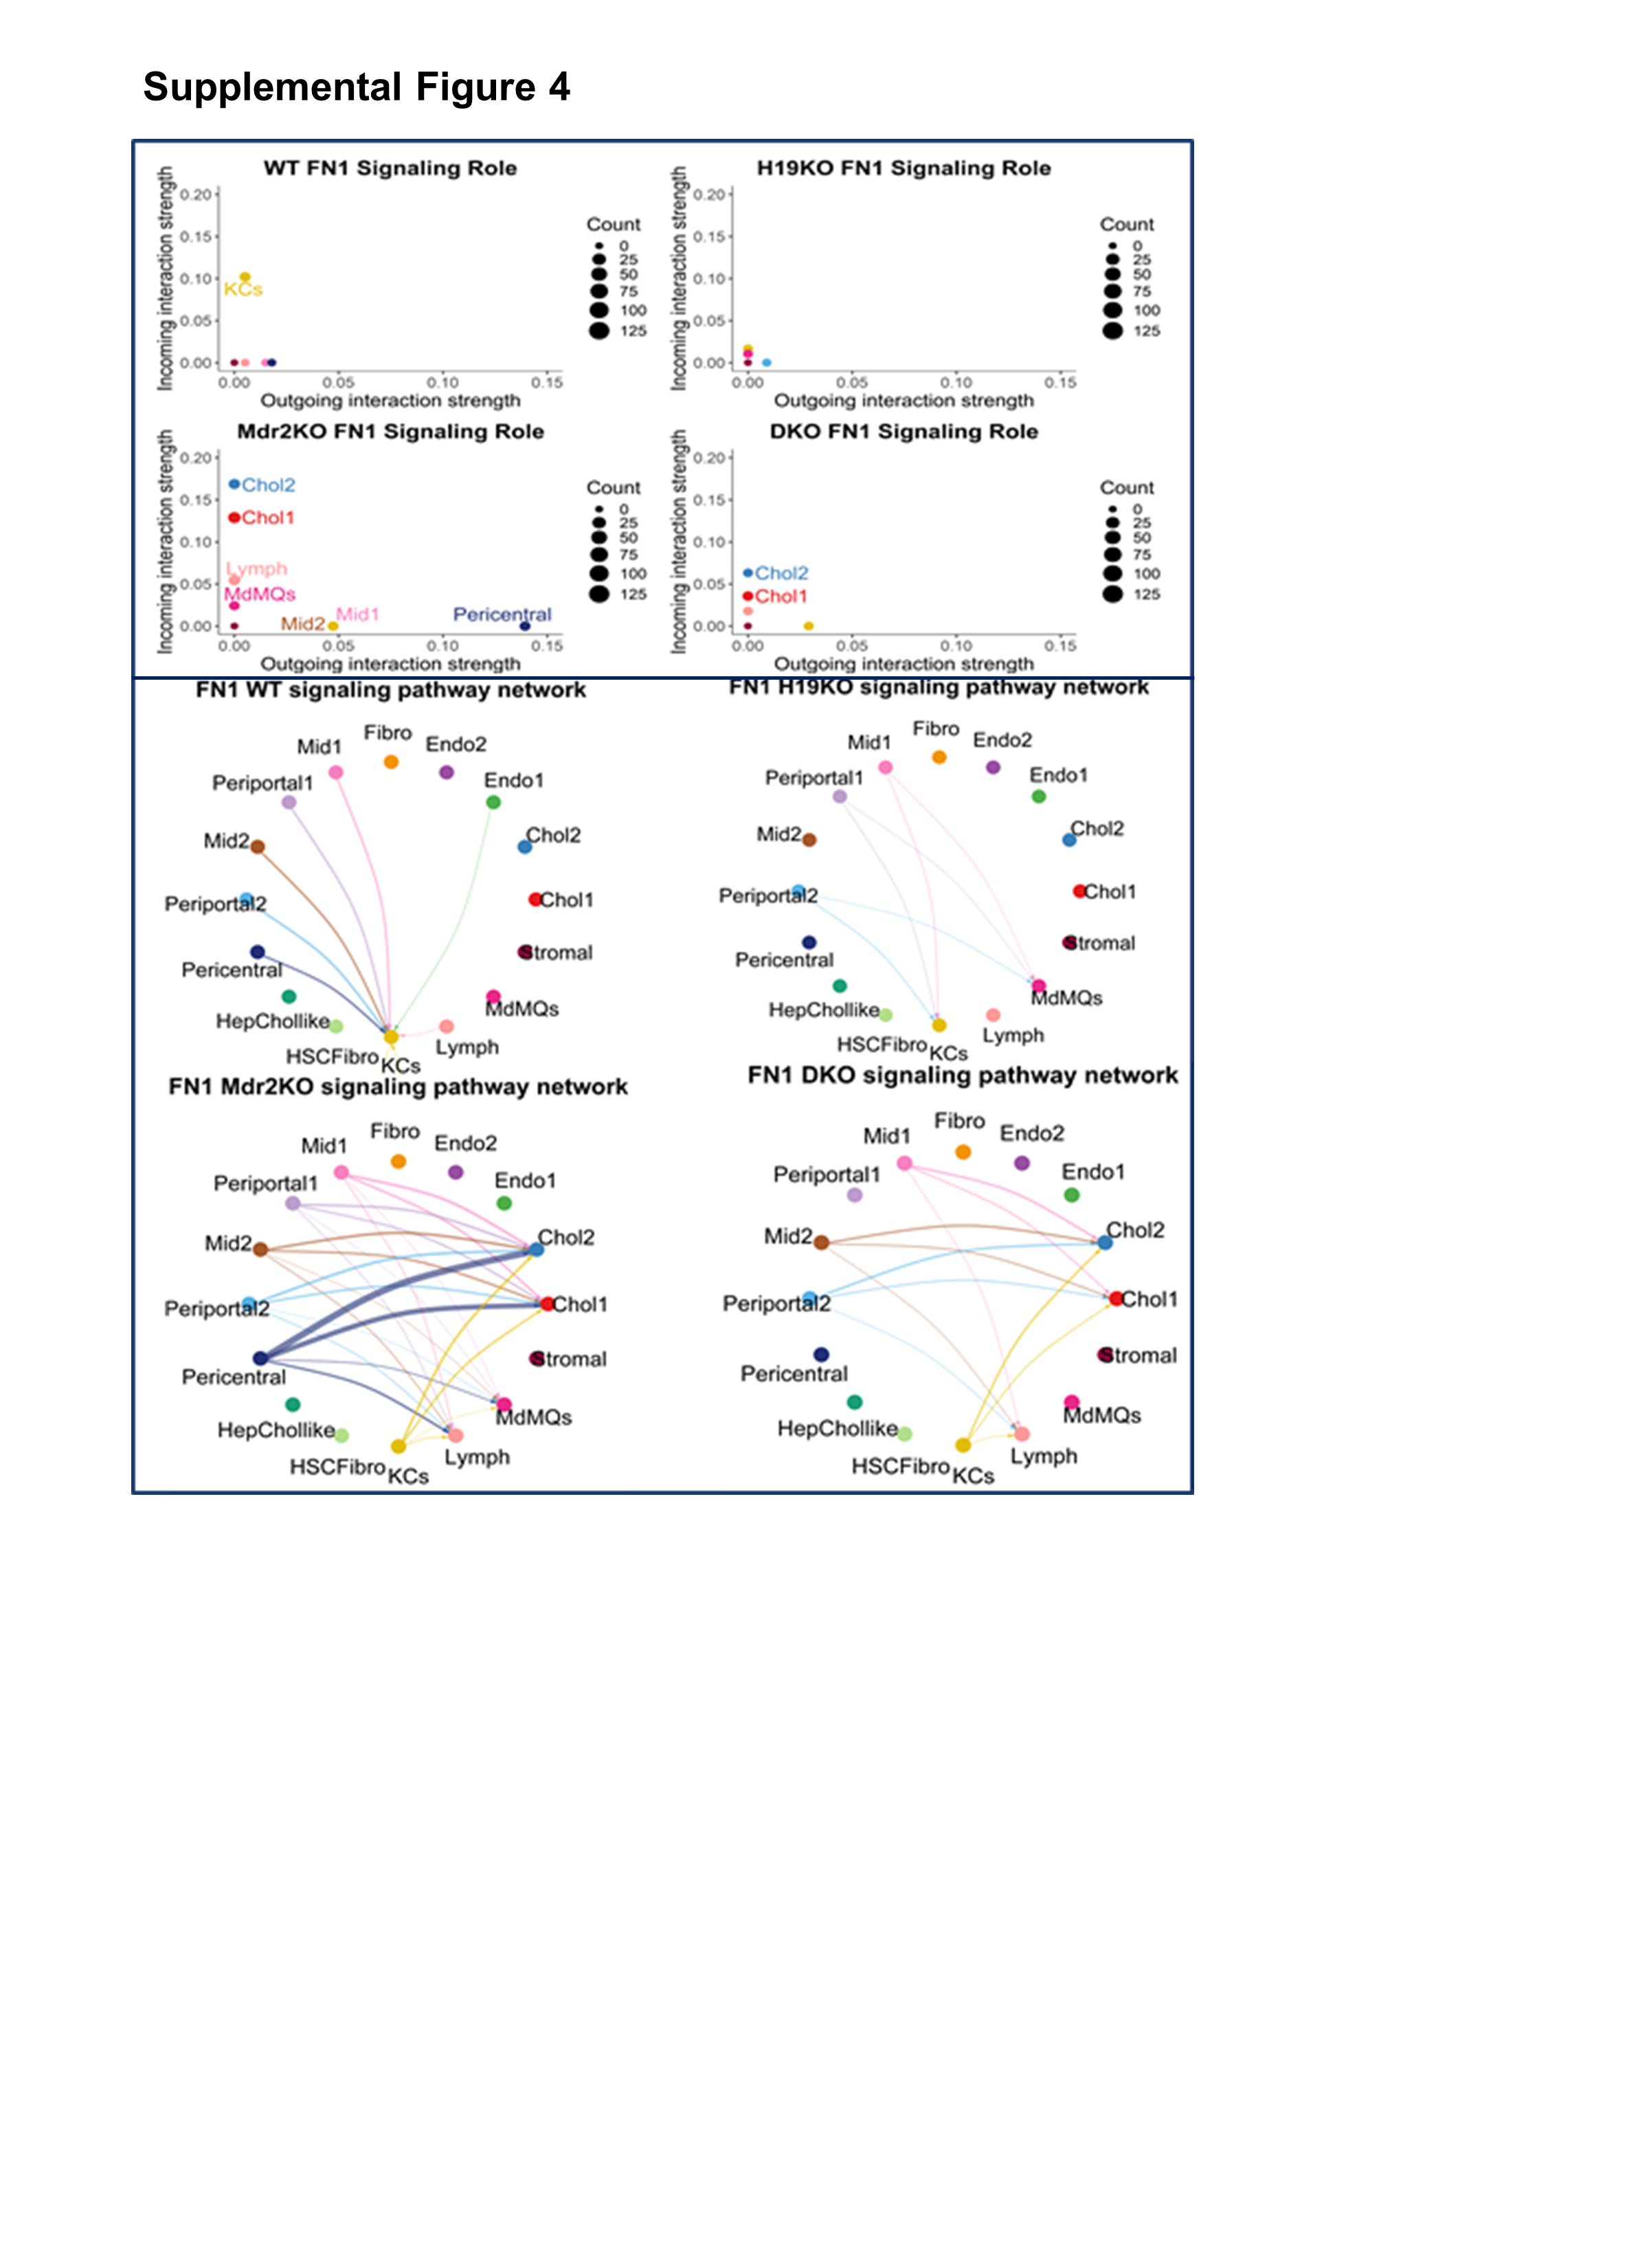


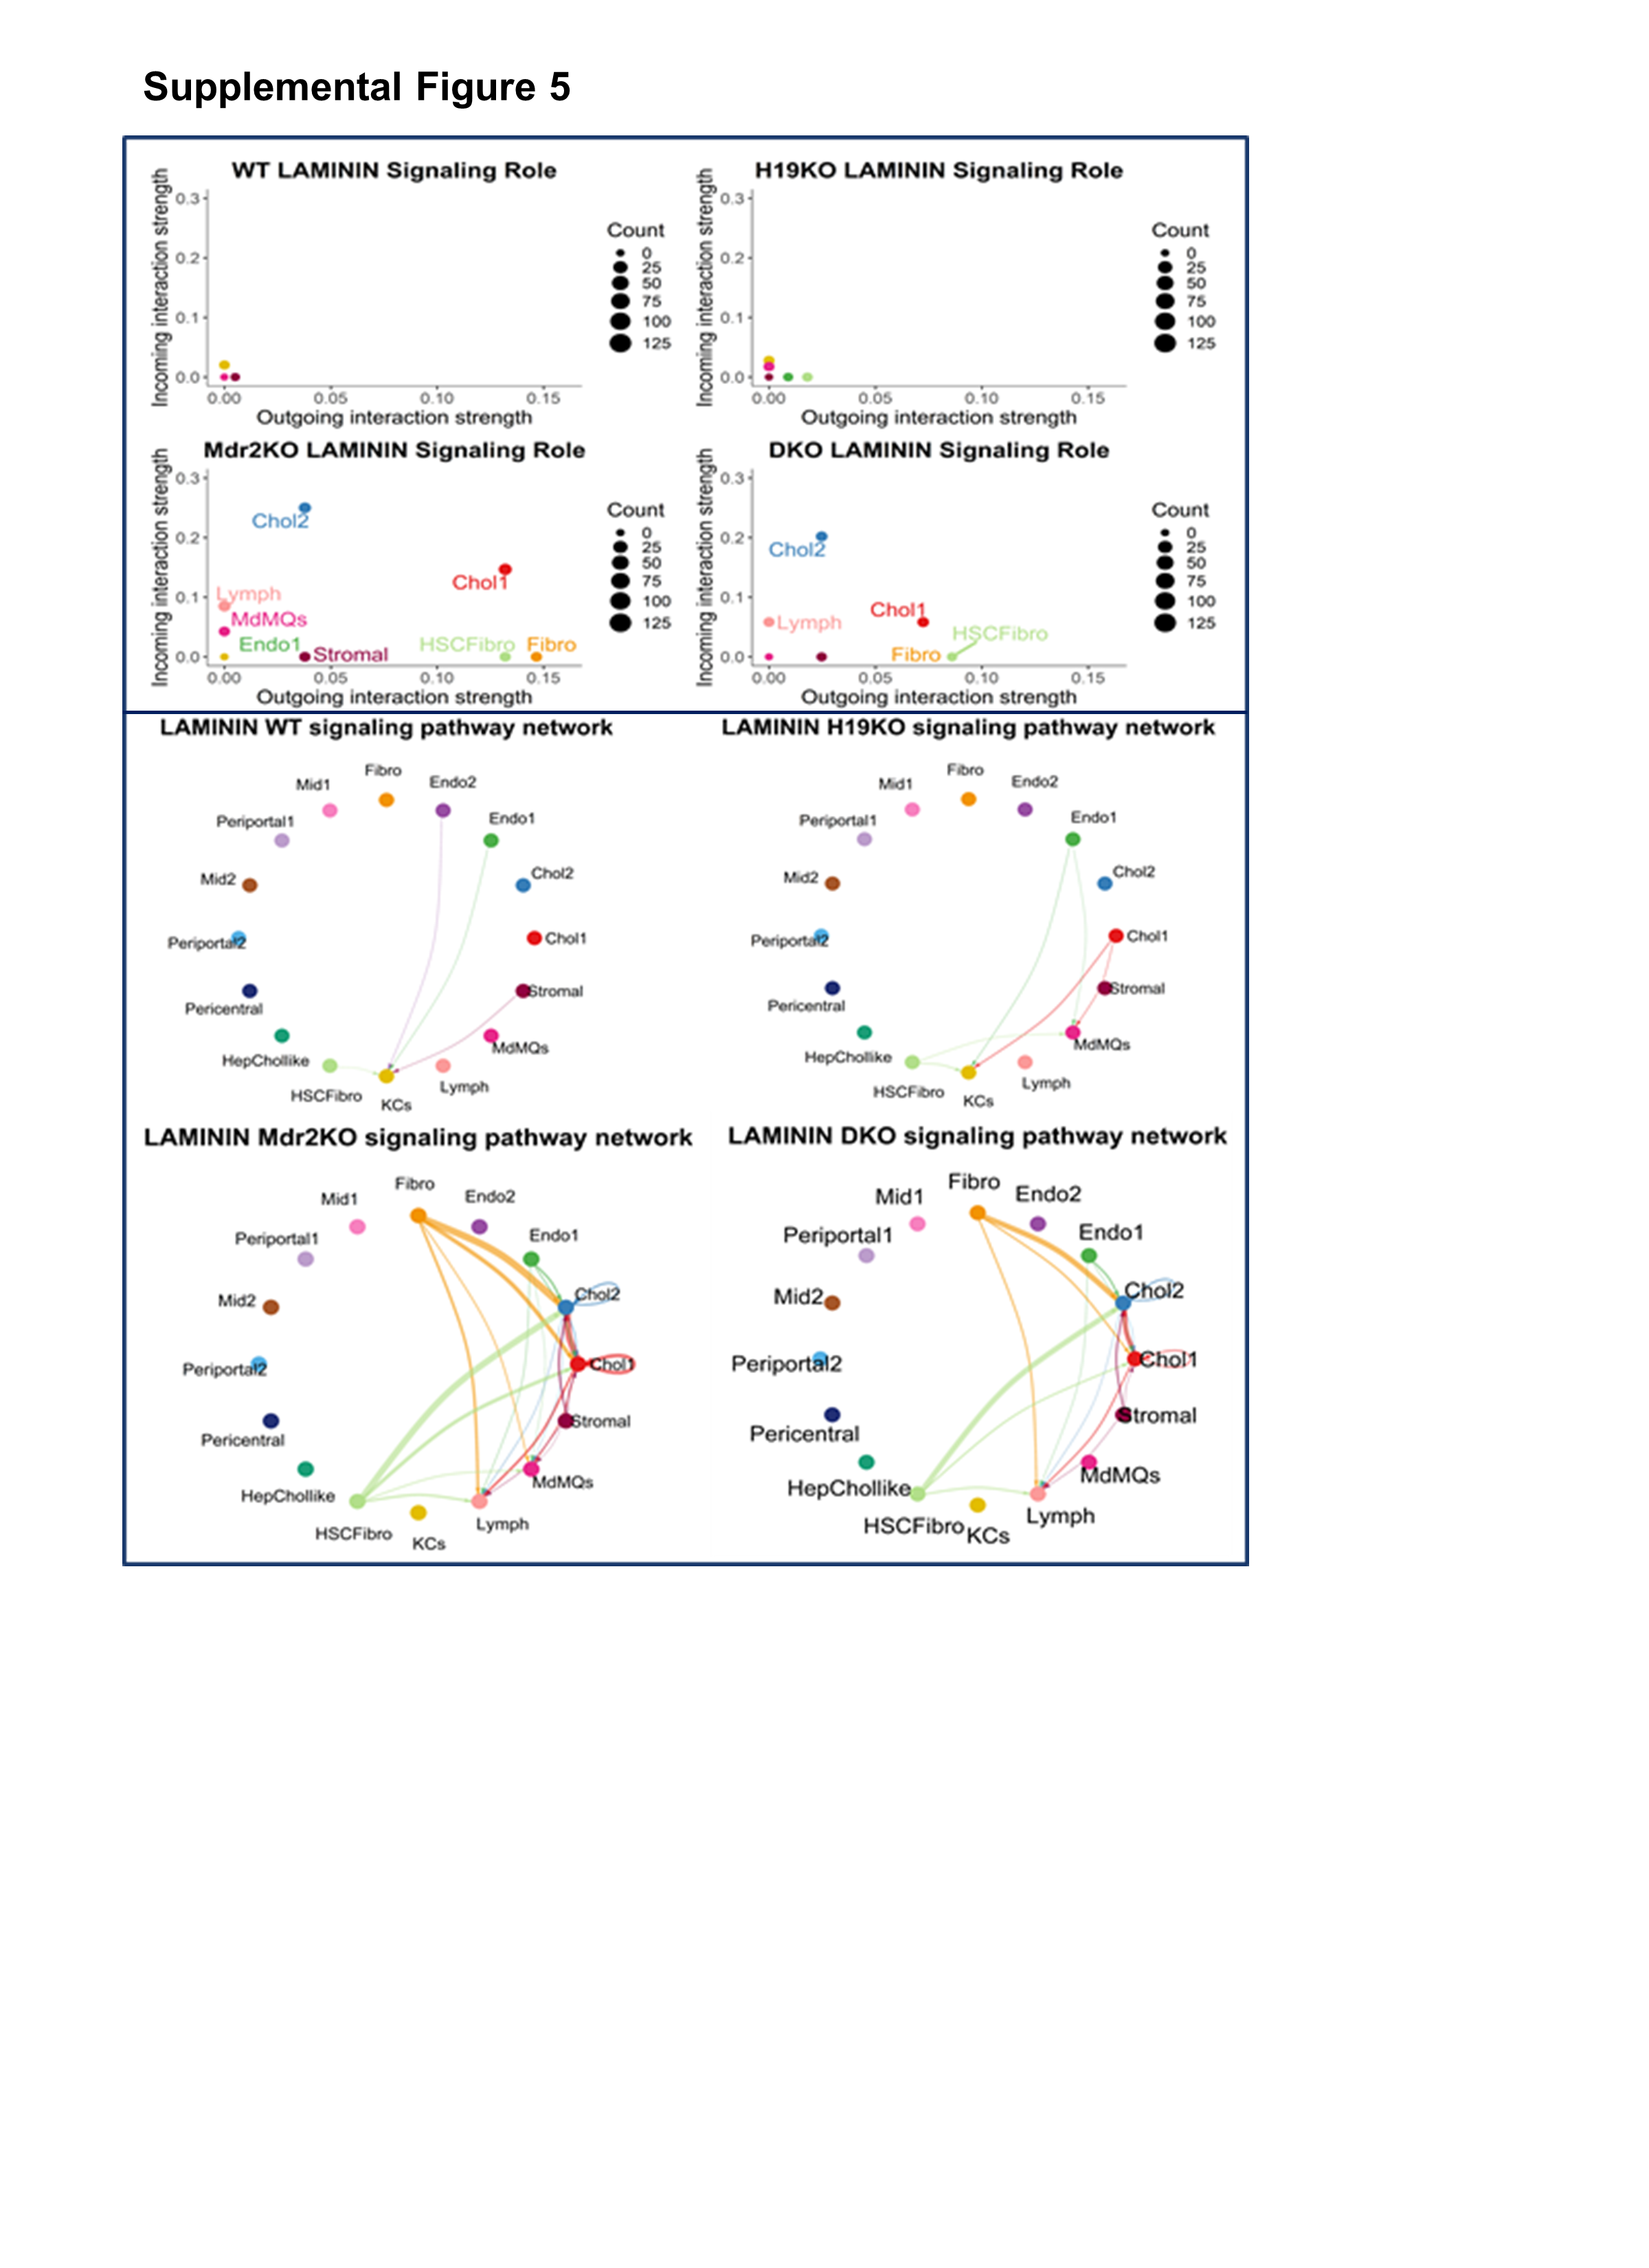


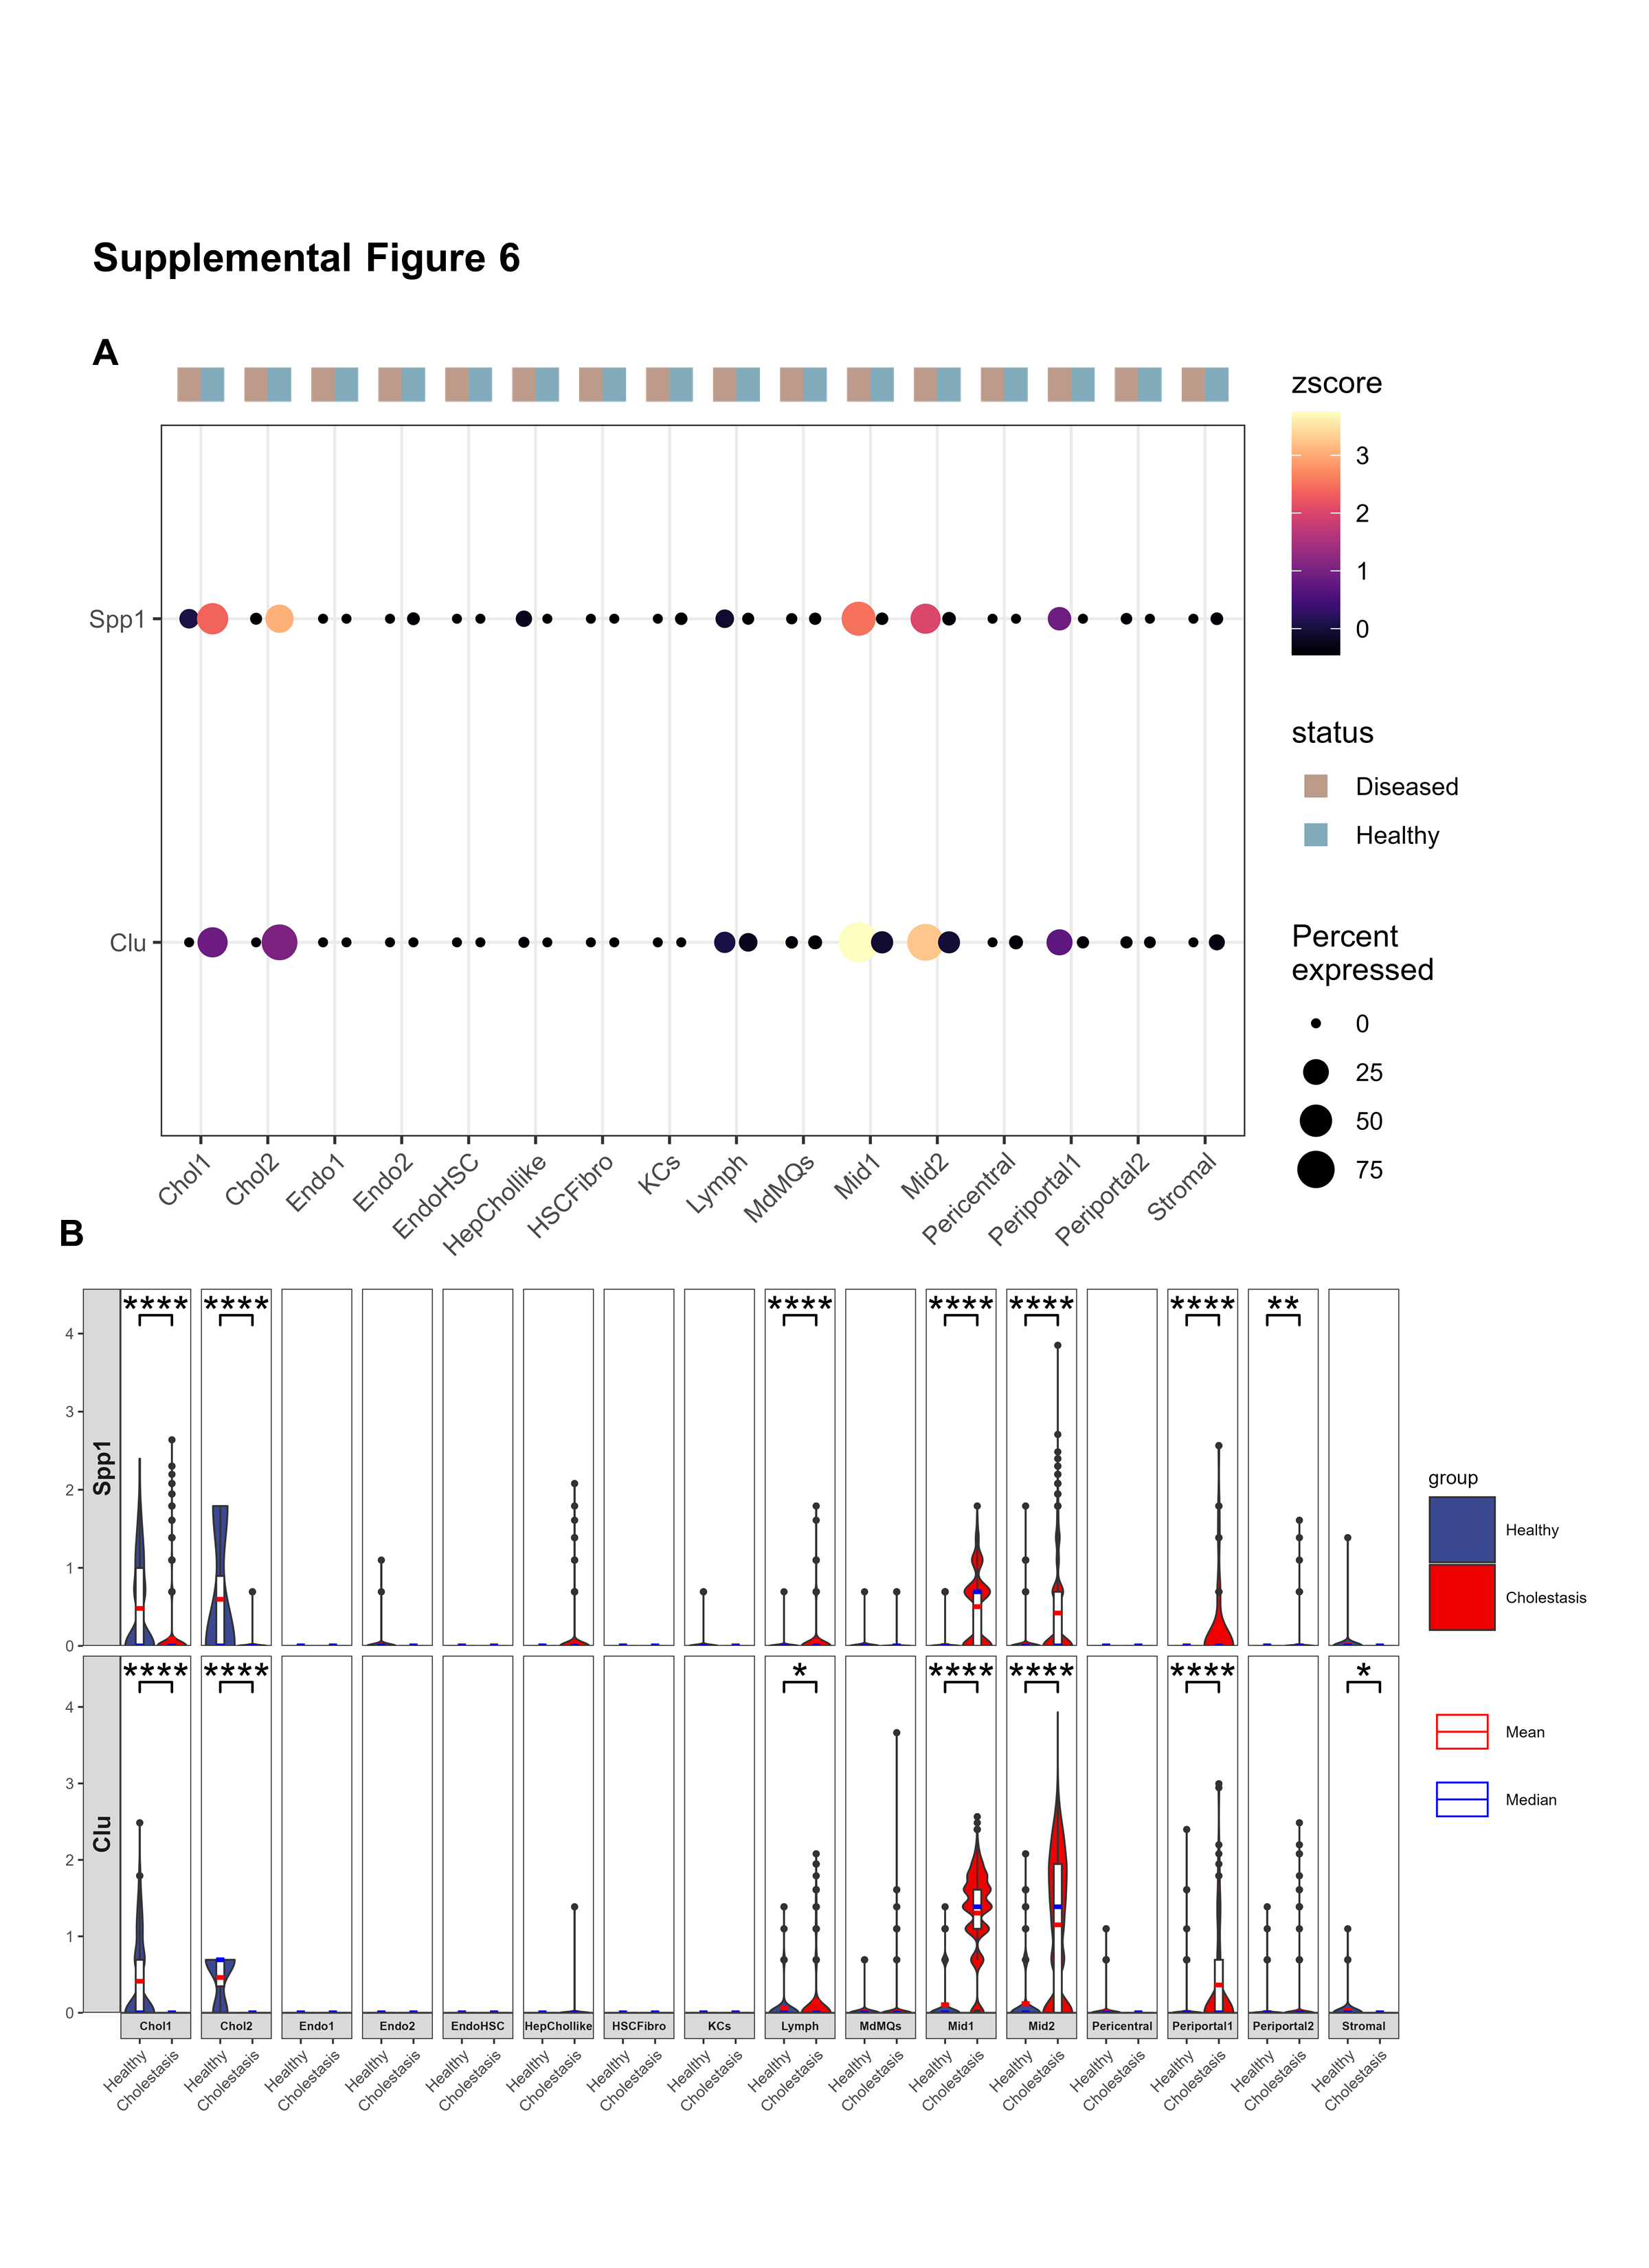


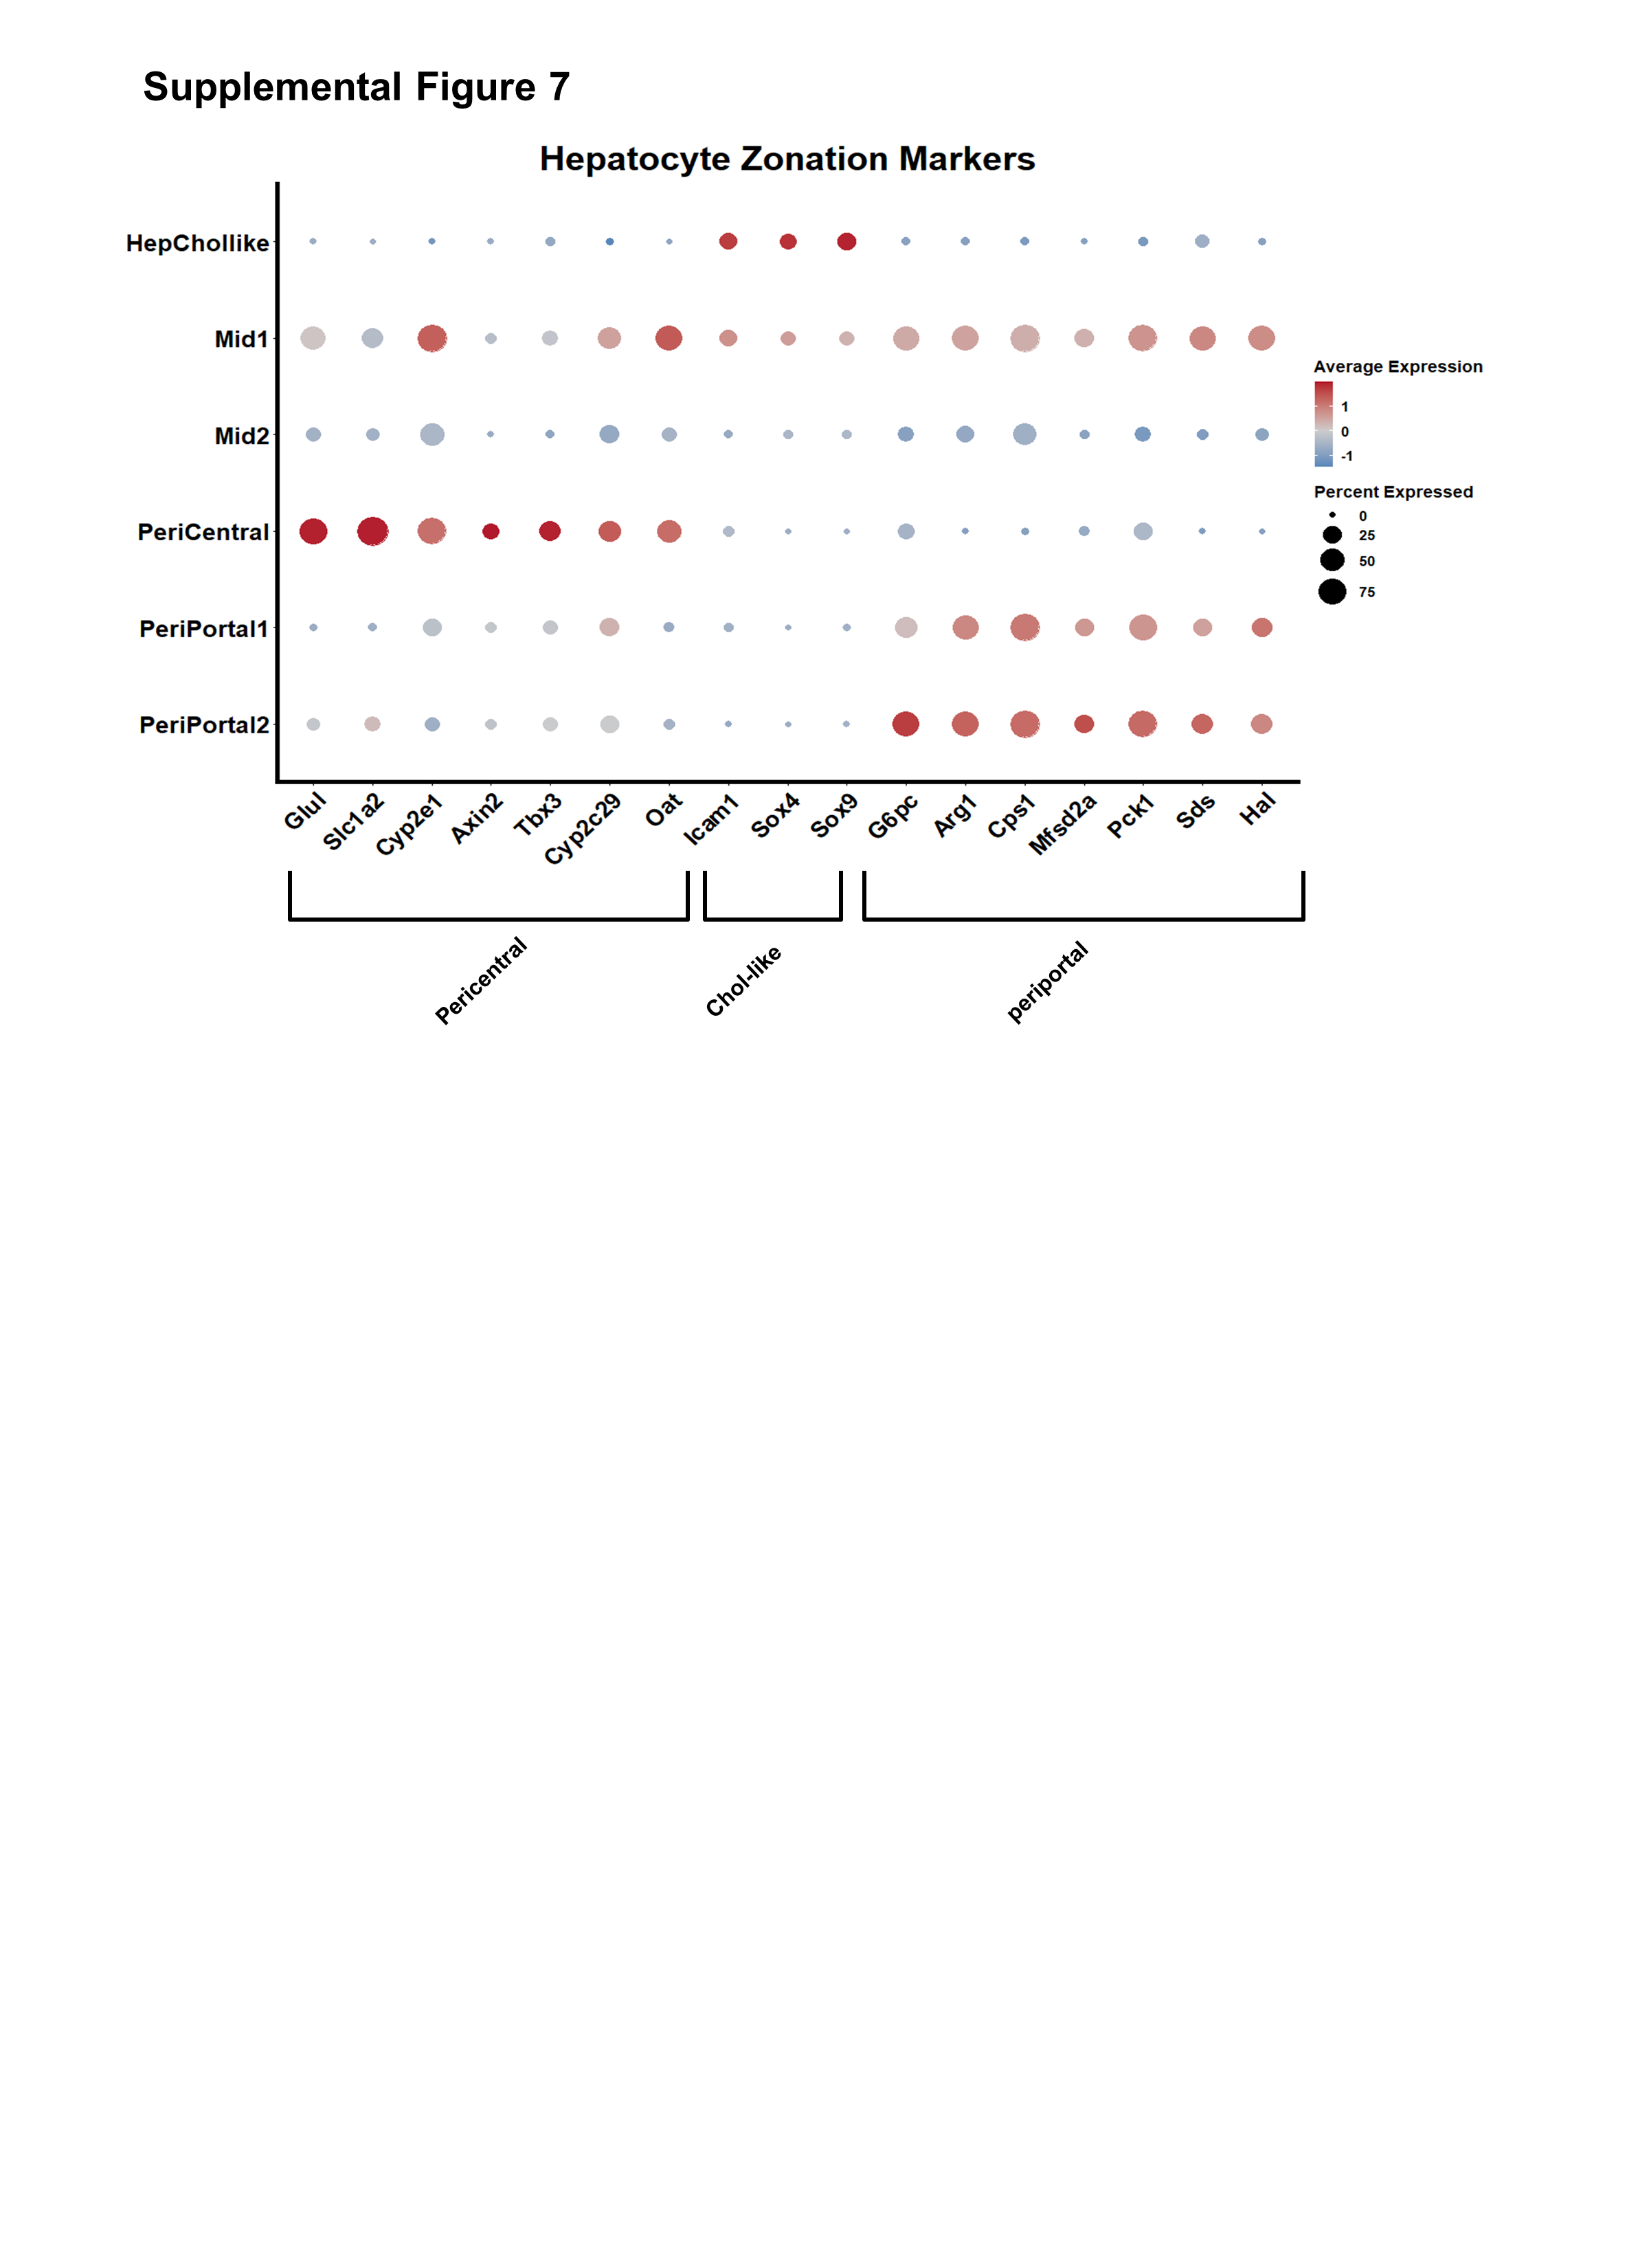


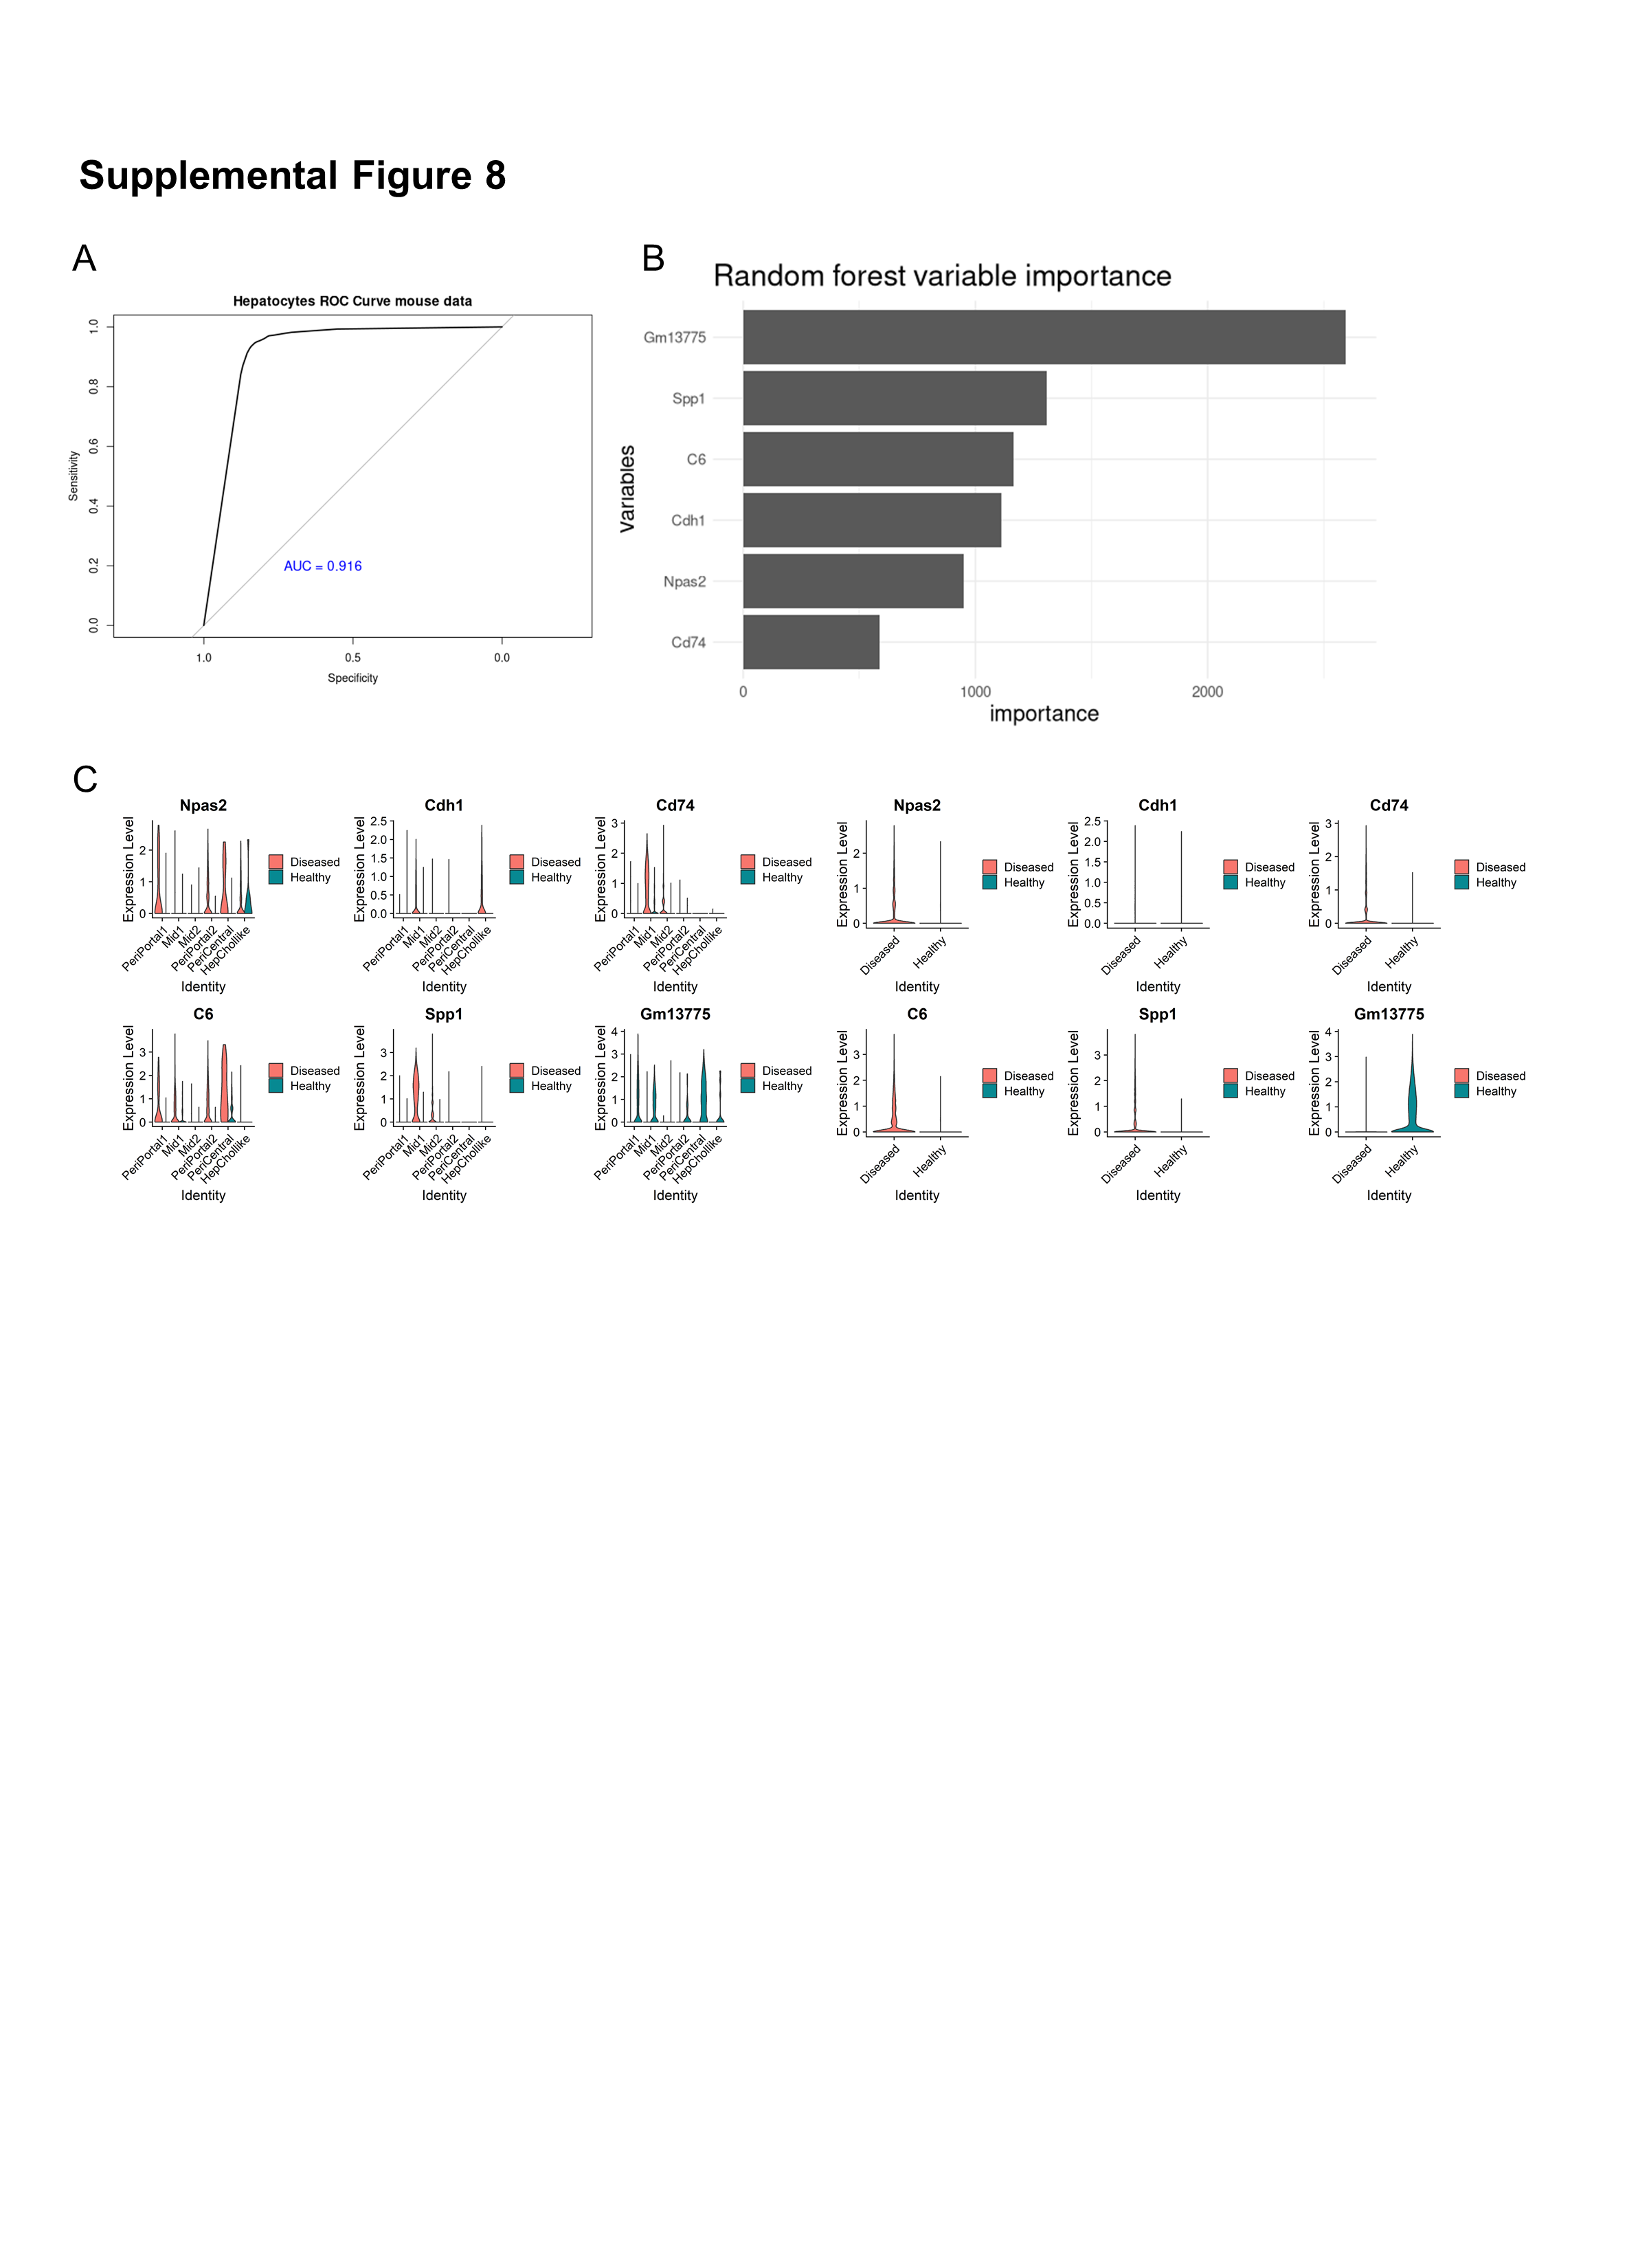


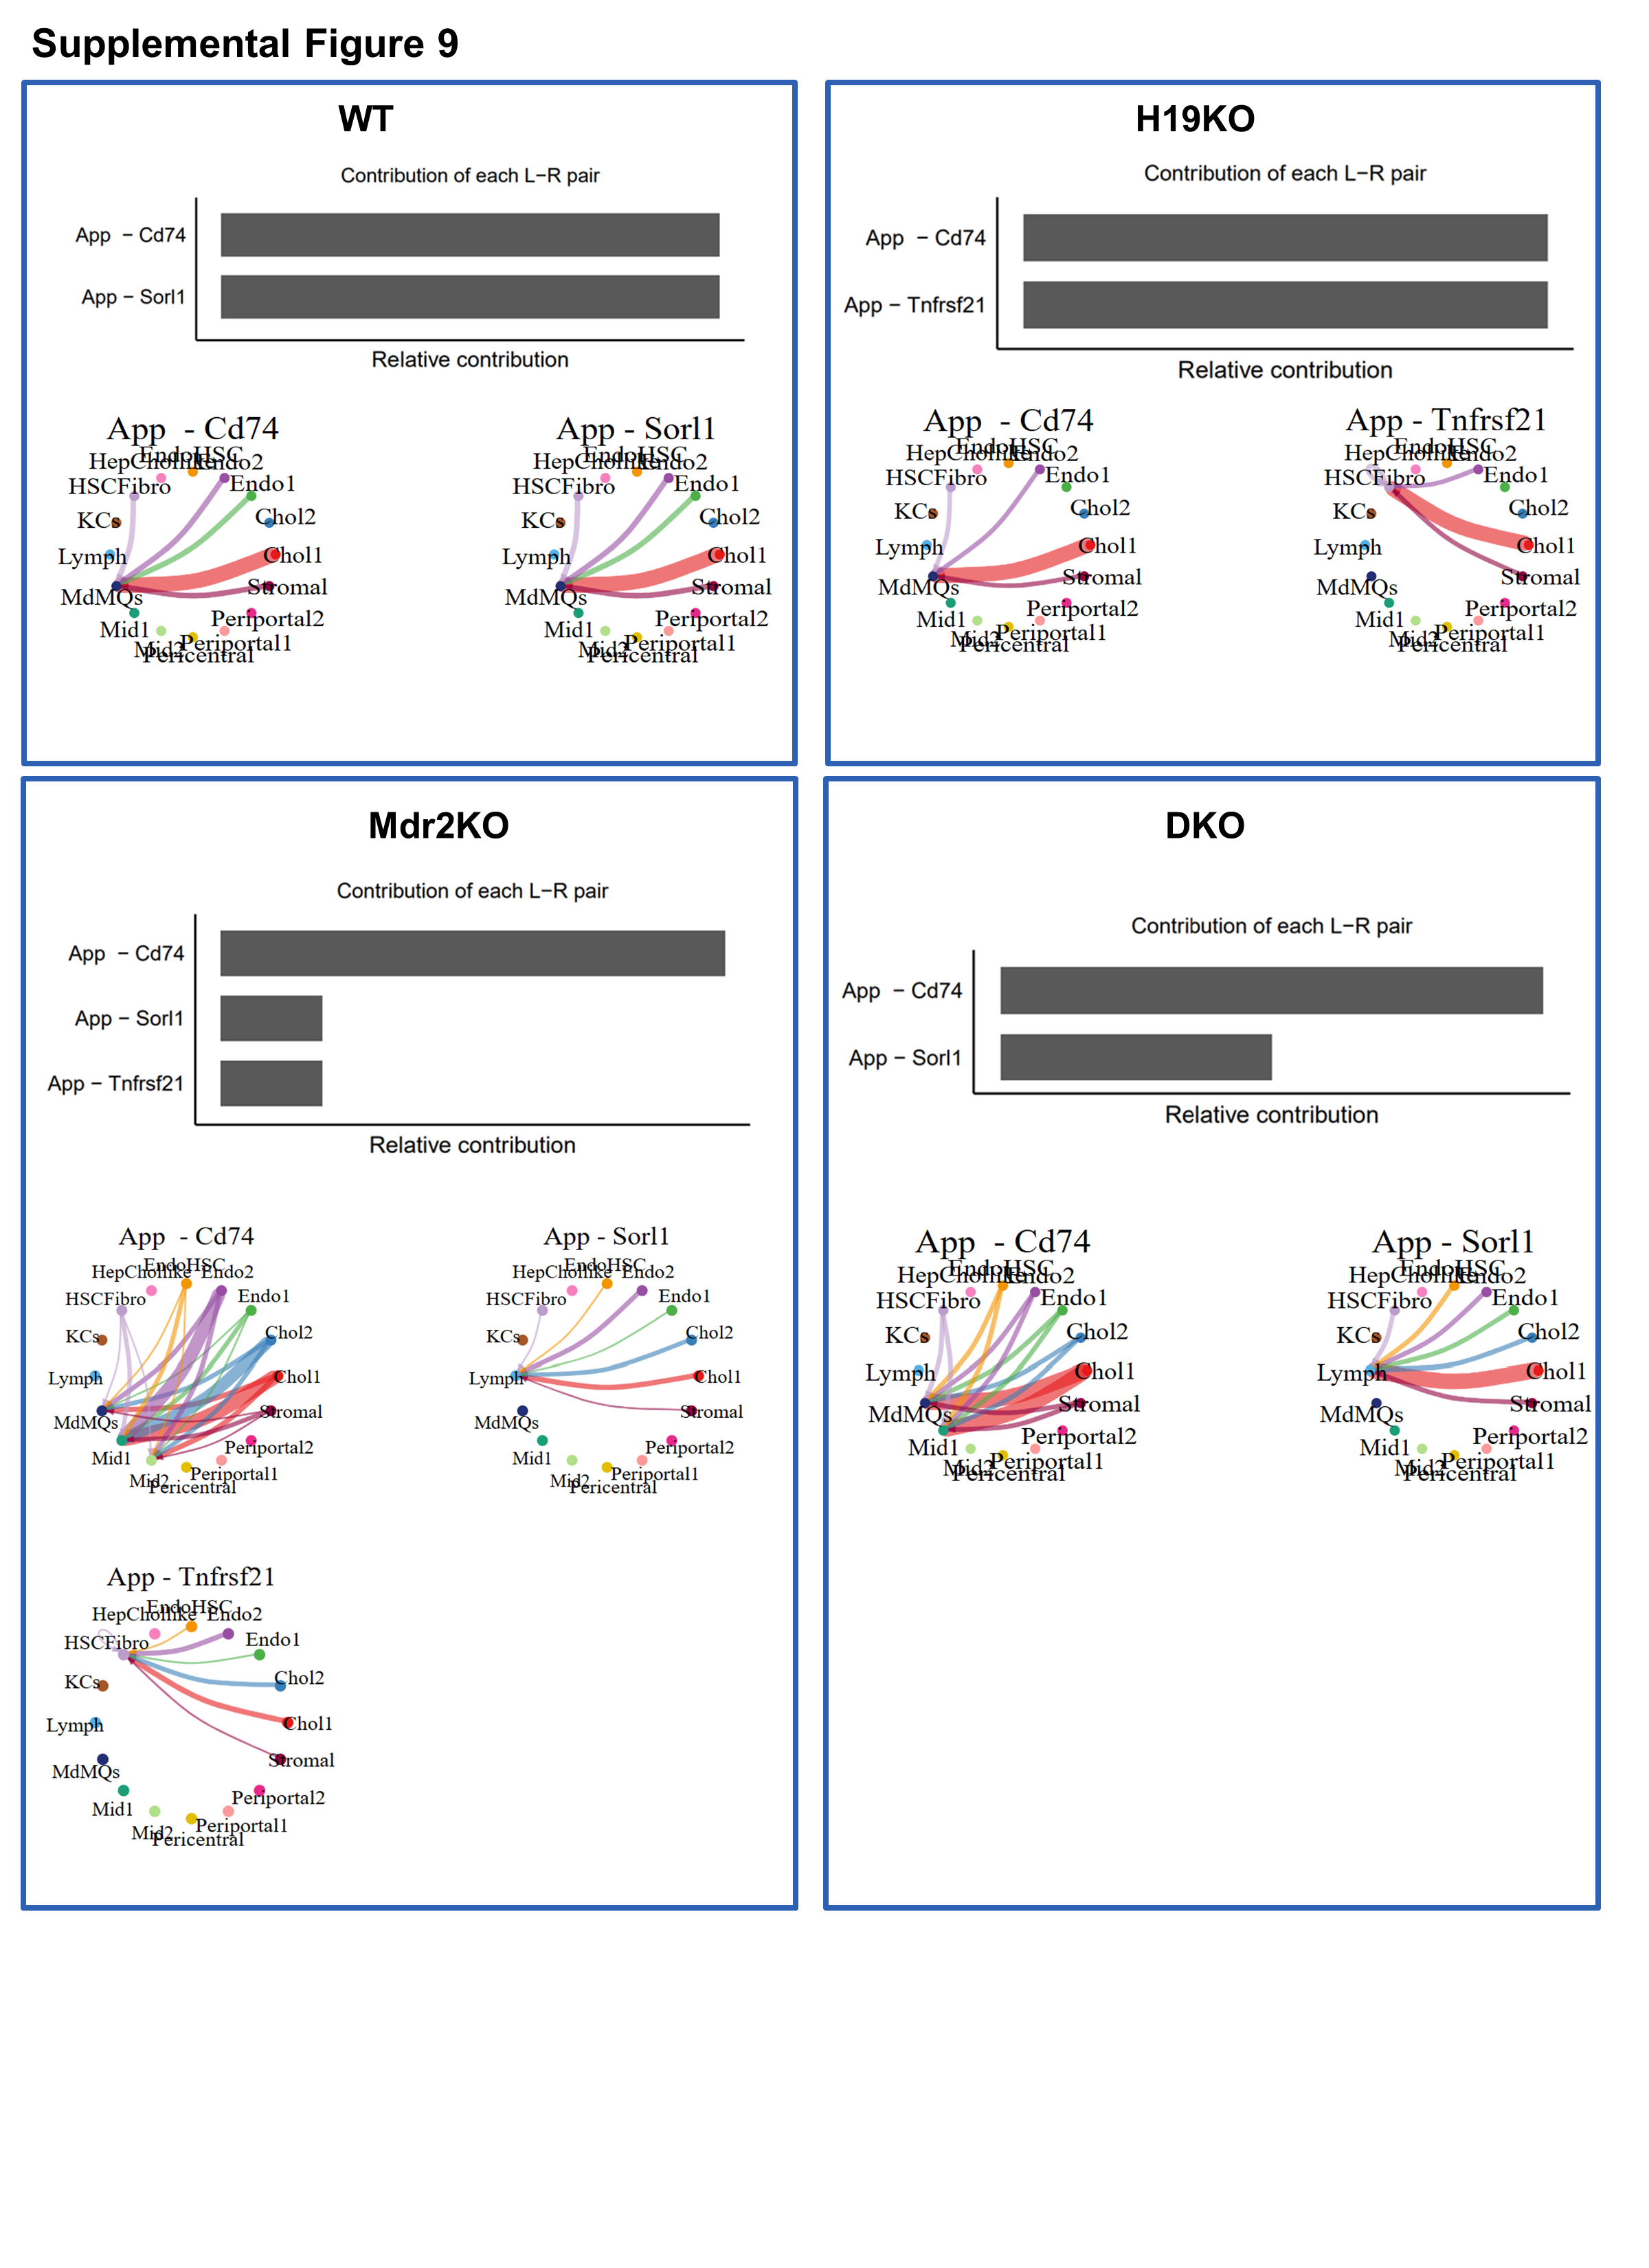


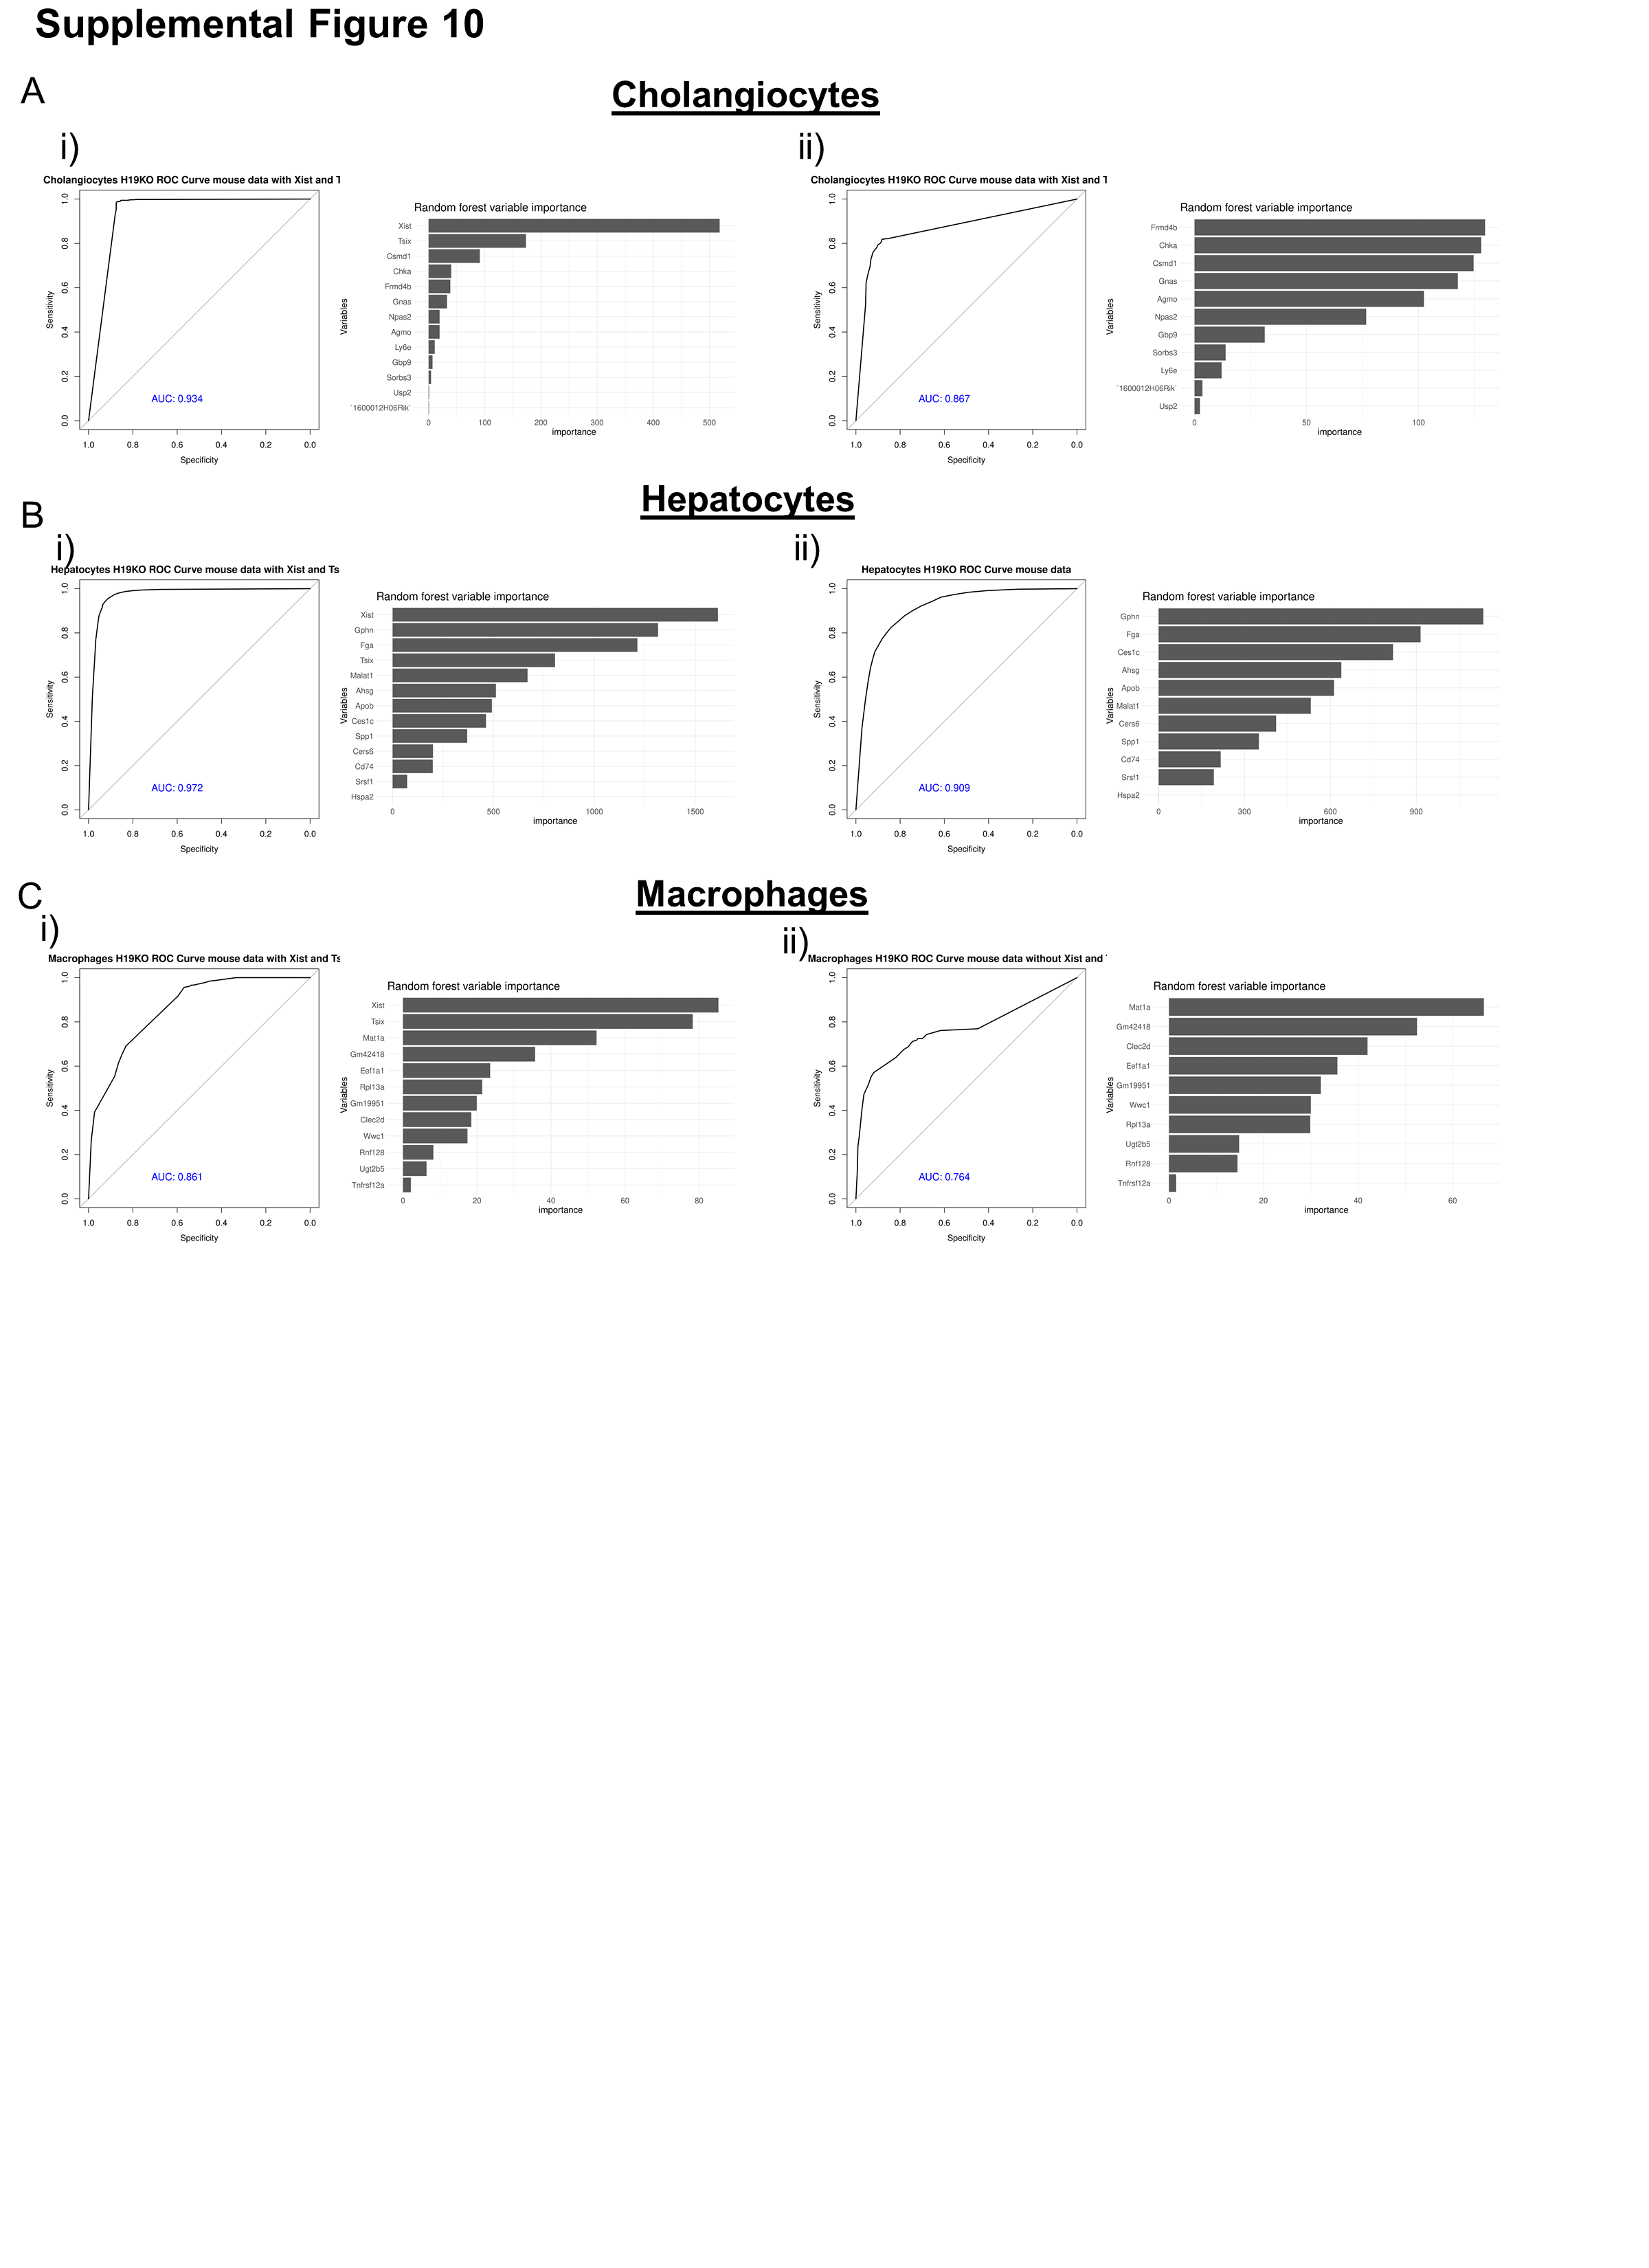

Supplement: Supplementary file 1 [file 06250b4993119d355cd890fc.docx]
